# Supplementary material for: The Indirect Efficacy Comparison of DNA Methylation in Sputum for Early Screening and Auxiliary Detection of Lung Cancer: A Meta-Analysis
Source: PubMed Central journal article supplement (PMC5551117; doi:10.3390/ijerph14070679), 2017-06-23
Supplement: ijerph-14-00679-s001.pdf [file ijerph-14-00679-s001.pdf]

**Supplementary Figures: Indirect comparisons between one methylated gene and 31 other genes.**

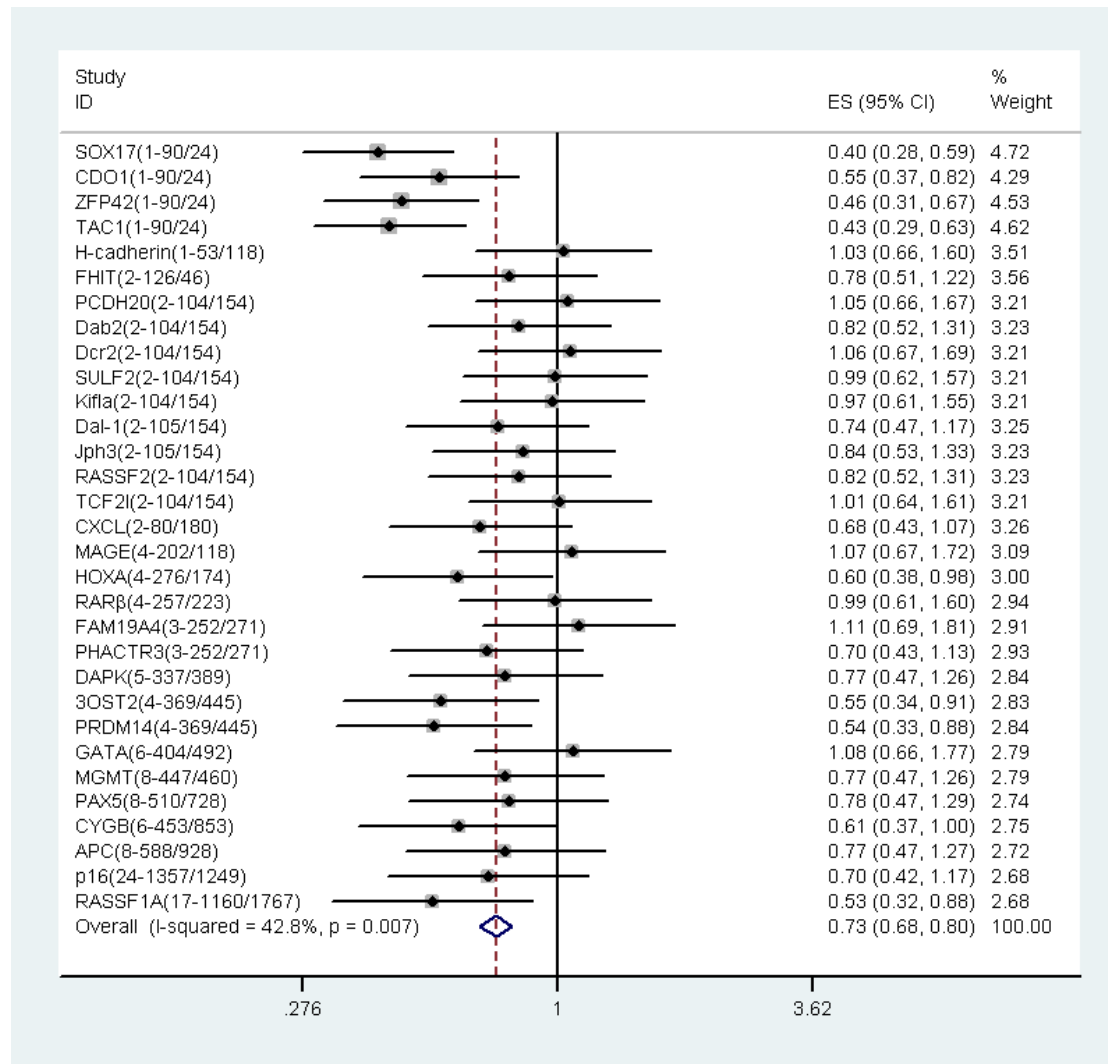

**Figure S1.** The diagnostic accuracy of *1/CDH1* compared with the other 31 methylated genes. OR >1 means that *1/CDH1* had a higher diagnostic accuracy, and 95% CI excluding 1 was considered significant.

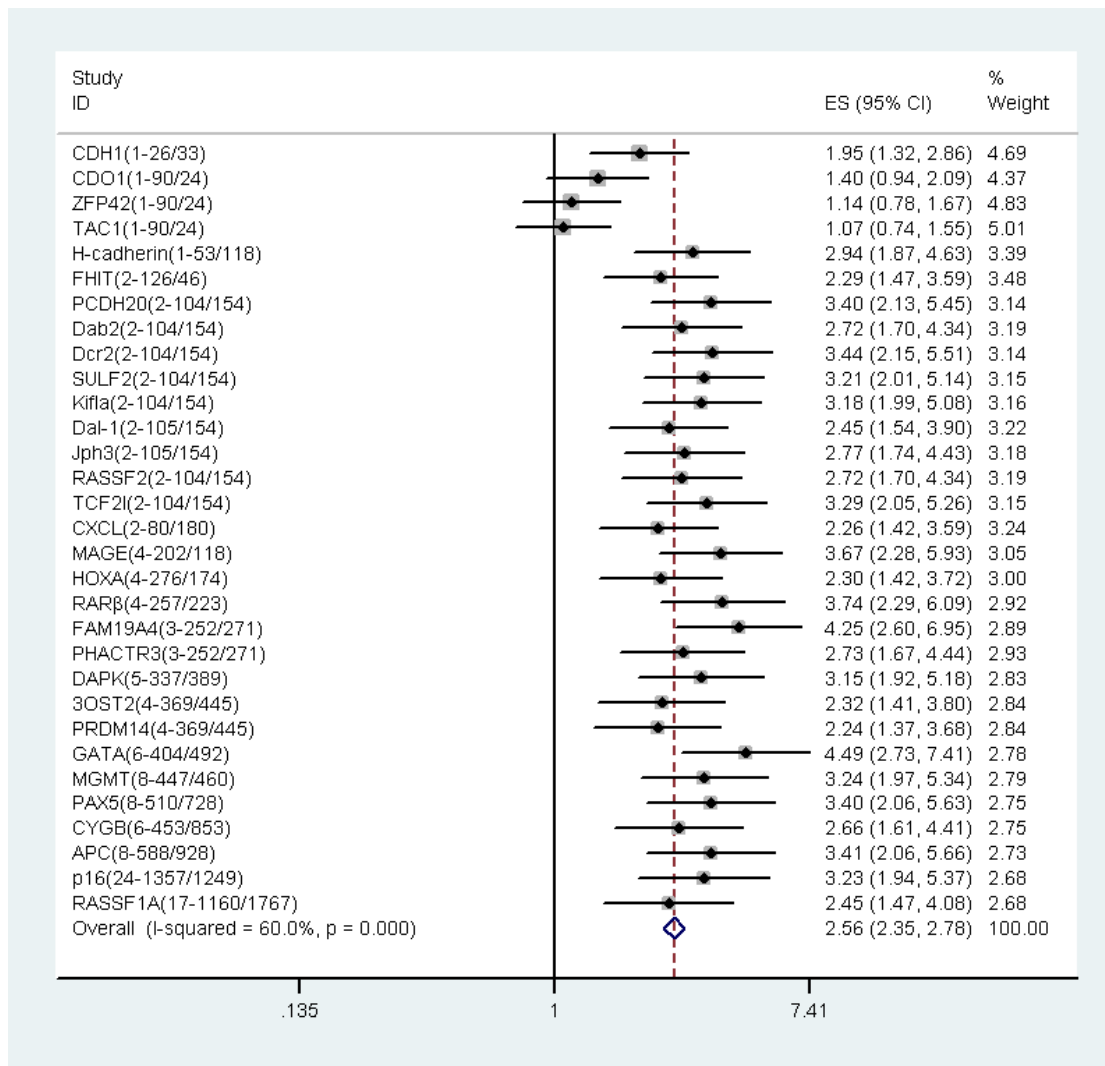

**Figure S2.** The diagnostic accuracy of 2/*SOX17* compared with the other 31 methylated genes. OR >1 means that 2/*SOX17* had a higher diagnostic accuracy, and 95% CI excluding 1 was considered significant.

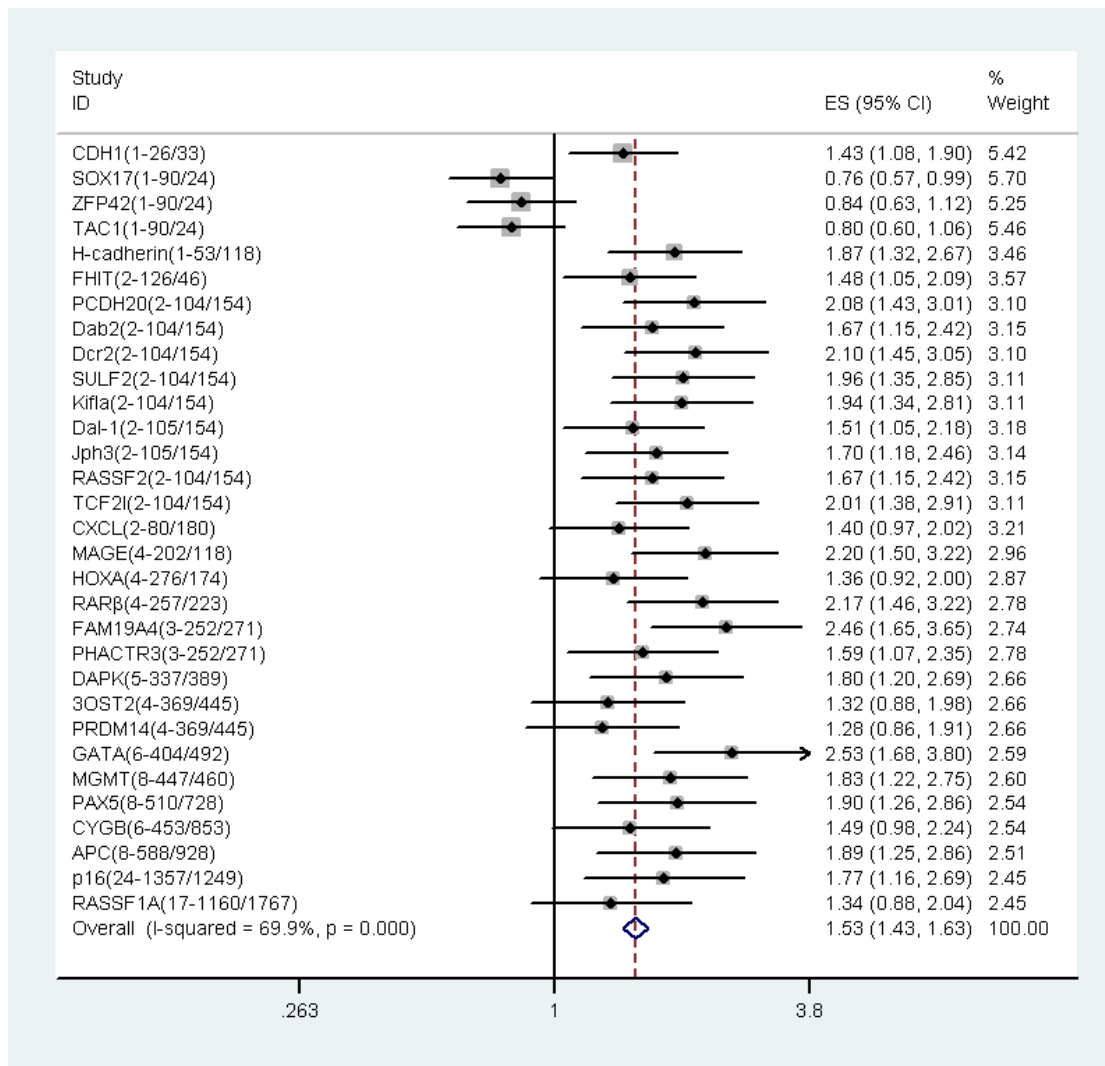

**Figure S3.** The diagnostic accuracy of 3/*CDO1* compared with the other 31 methylated genes. OR >1 means that 3/*CDO1* had a higher diagnostic accuracy, and 95% CI excluding 1 was considered significant.

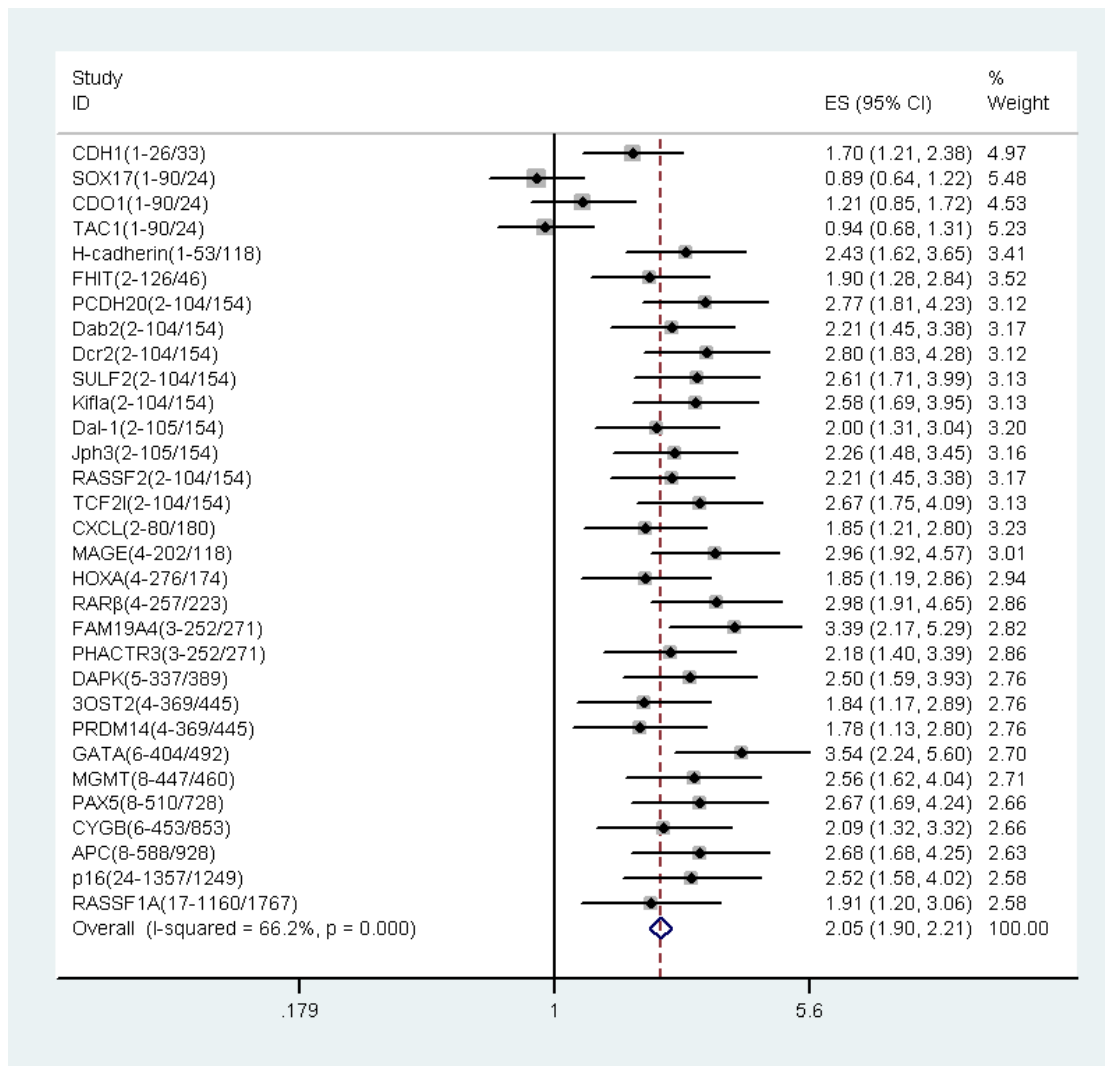

**Figure S4.** The diagnostic accuracy of 4/ZFP42 compared with the other 31 methylated genes. OR >1 means that 4/ZFP42 had a higher diagnostic accuracy, and 95% CI excluding 1 was considered significant.

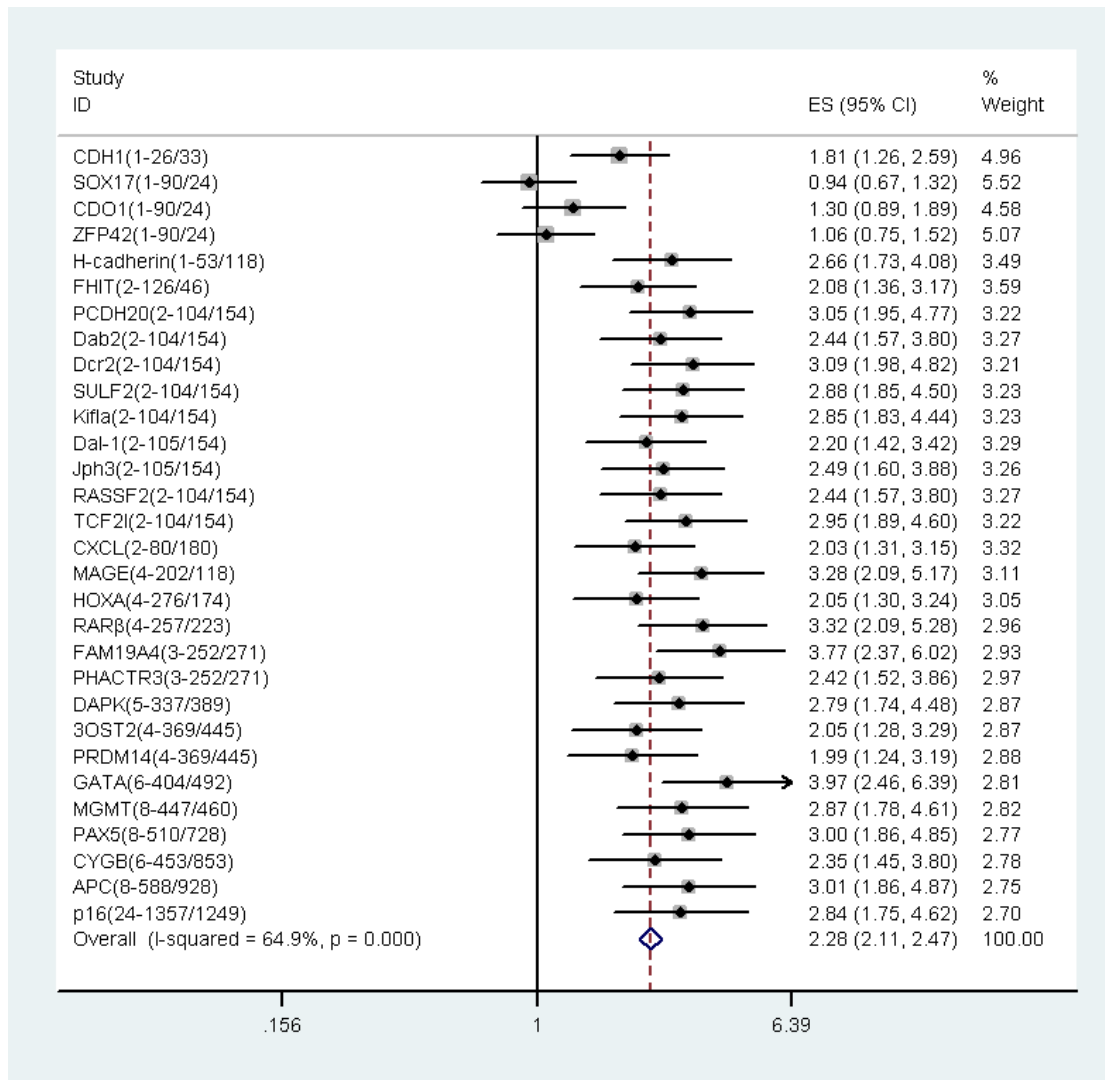

**Figure S5.** The diagnostic accuracy of *5/TAC1* compared with the other 28 methylated genes. OR >1 means that *5/TAC1* had a higher diagnostic accuracy, and 95% CI excluding 1 was considered significant.

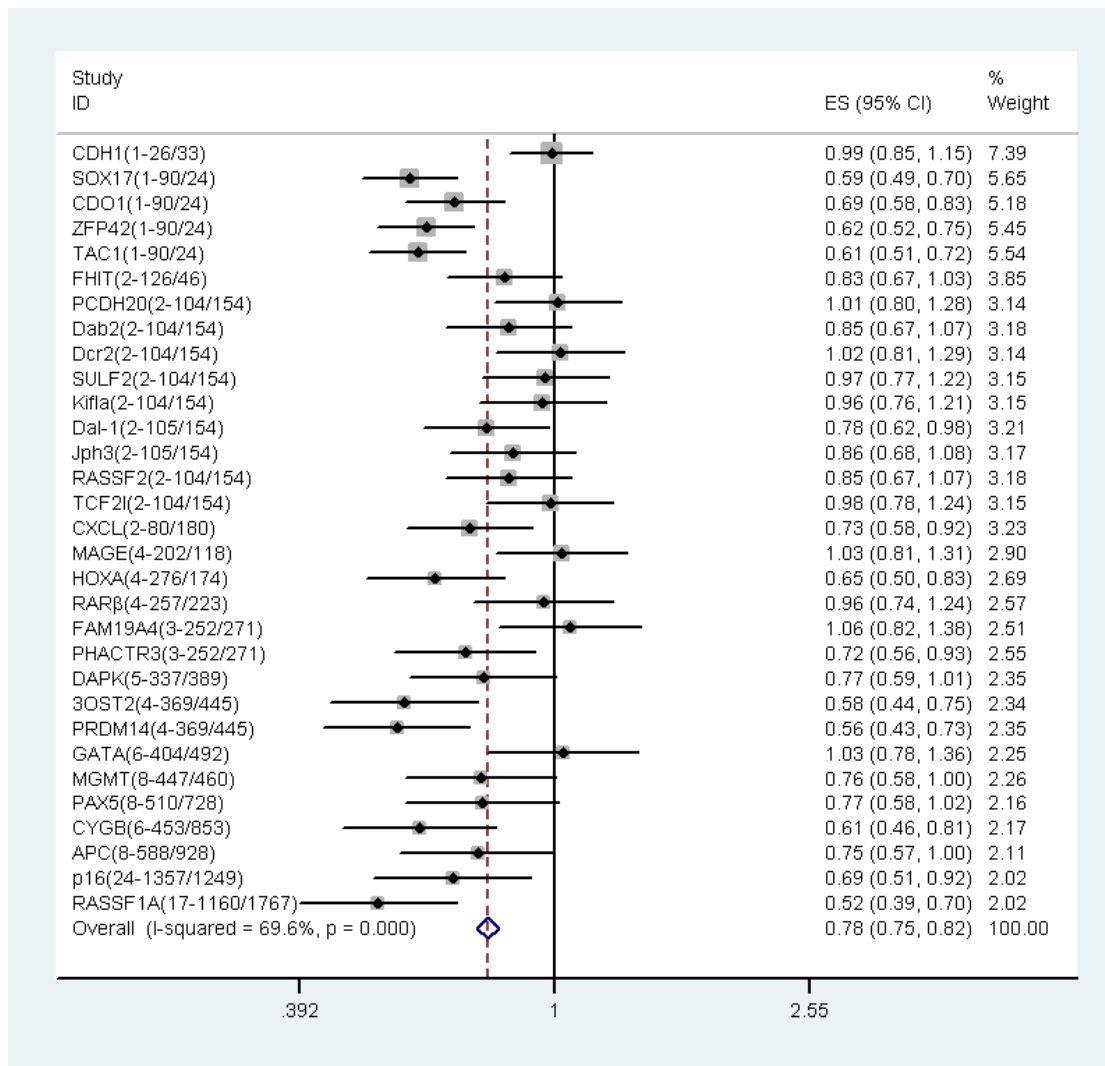

**Figure S6.** The diagnostic accuracy of *6/H-cadherin* compared with the other 31 methylated genes. OR >1 means that *6/H-cadherin* had a higher diagnostic accuracy, and 95% CI excluding 1 was considered significant.

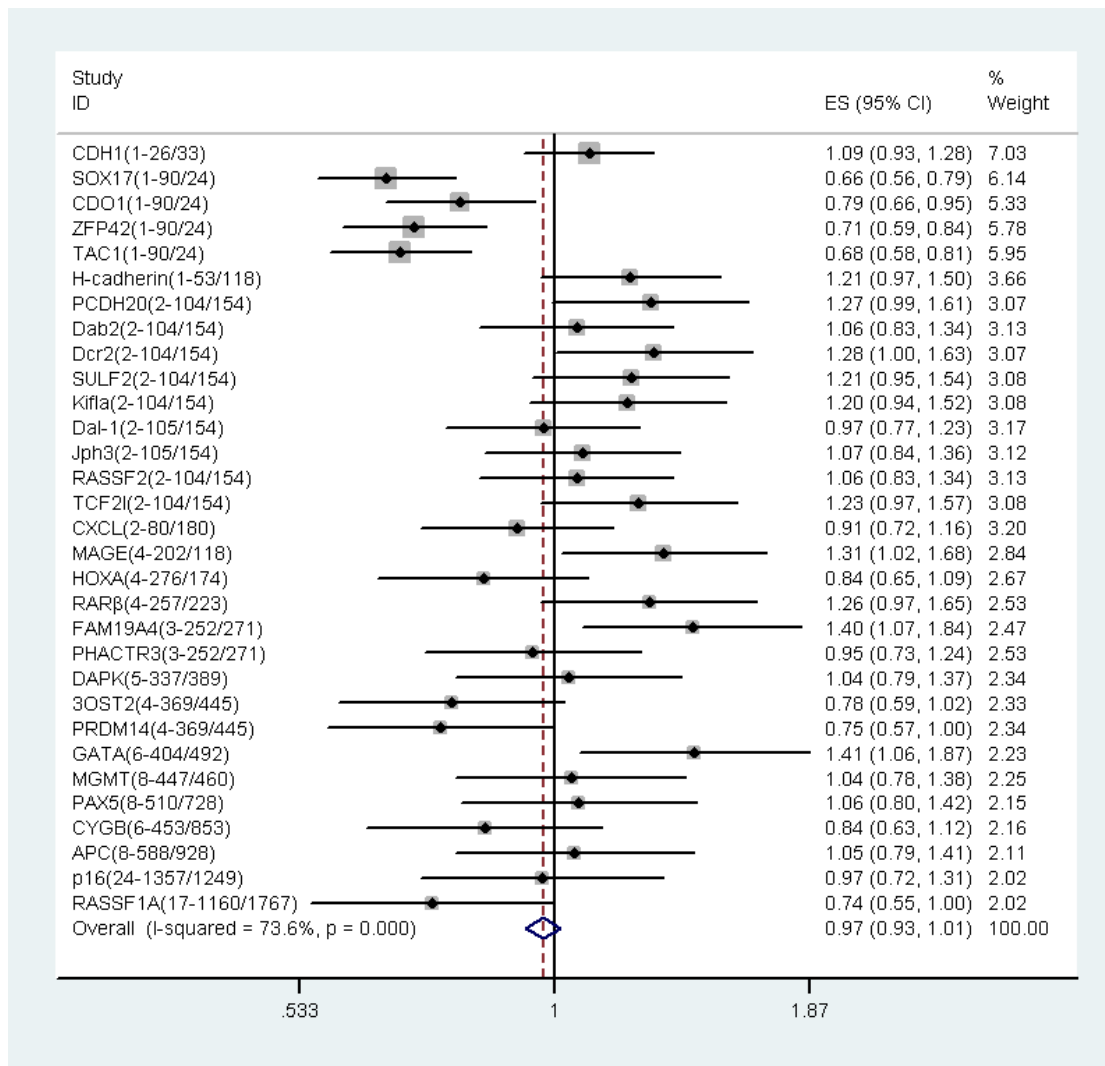

**Figure S7.** The diagnostic accuracy of *7/FHIT* compared with the other 31 methylated genes. OR >1 means that *7/FHIT* had a higher diagnostic accuracy, and 95% CI excluding 1 was considered significant.

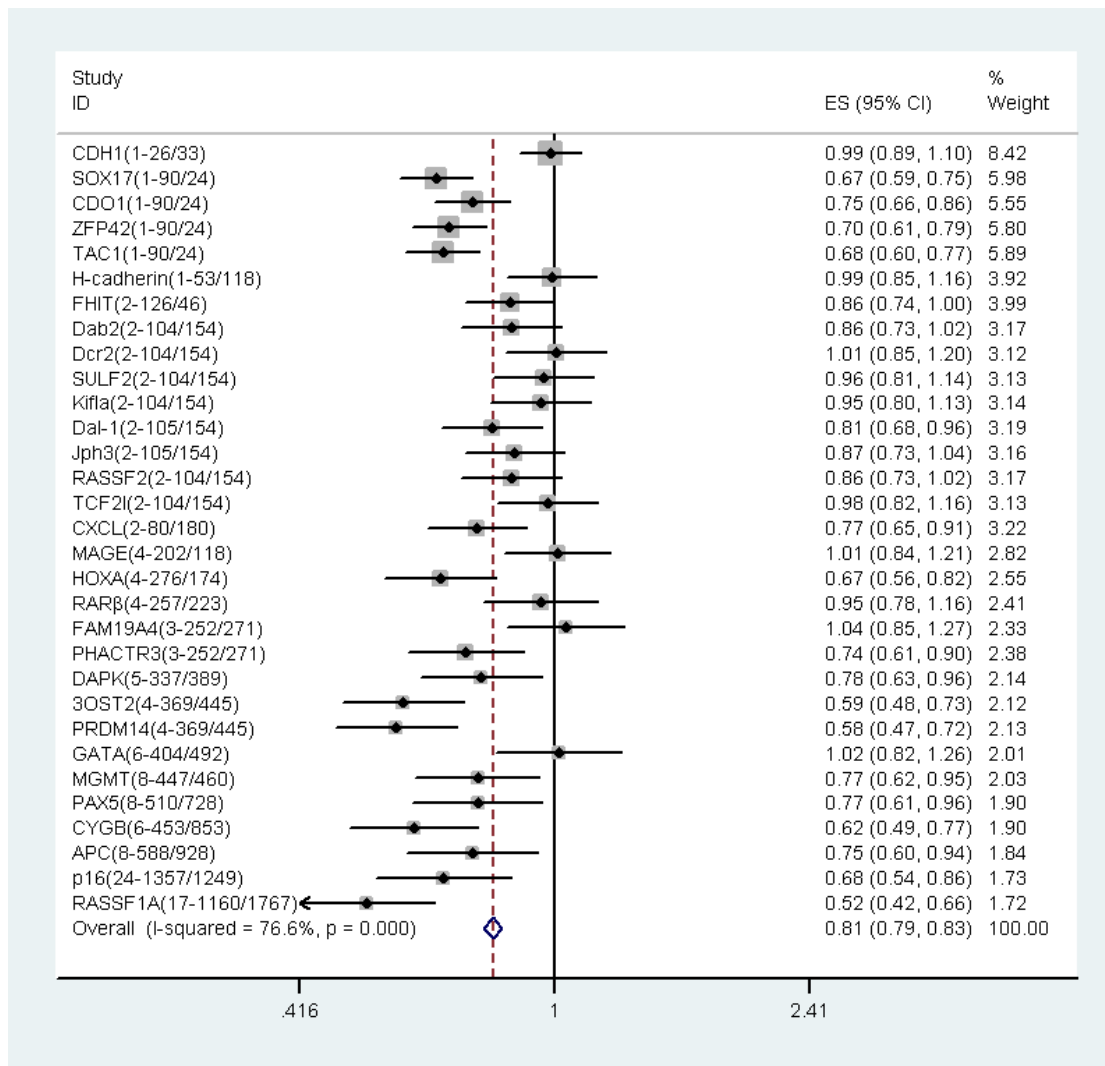

**Figure S8.** The diagnostic accuracy of 8/*PCDH20* compared with the other 31 methylated genes. OR >1 means that 8/*PCDH20* had a higher diagnostic accuracy, and 95% CI excluding 1 was considered significant.



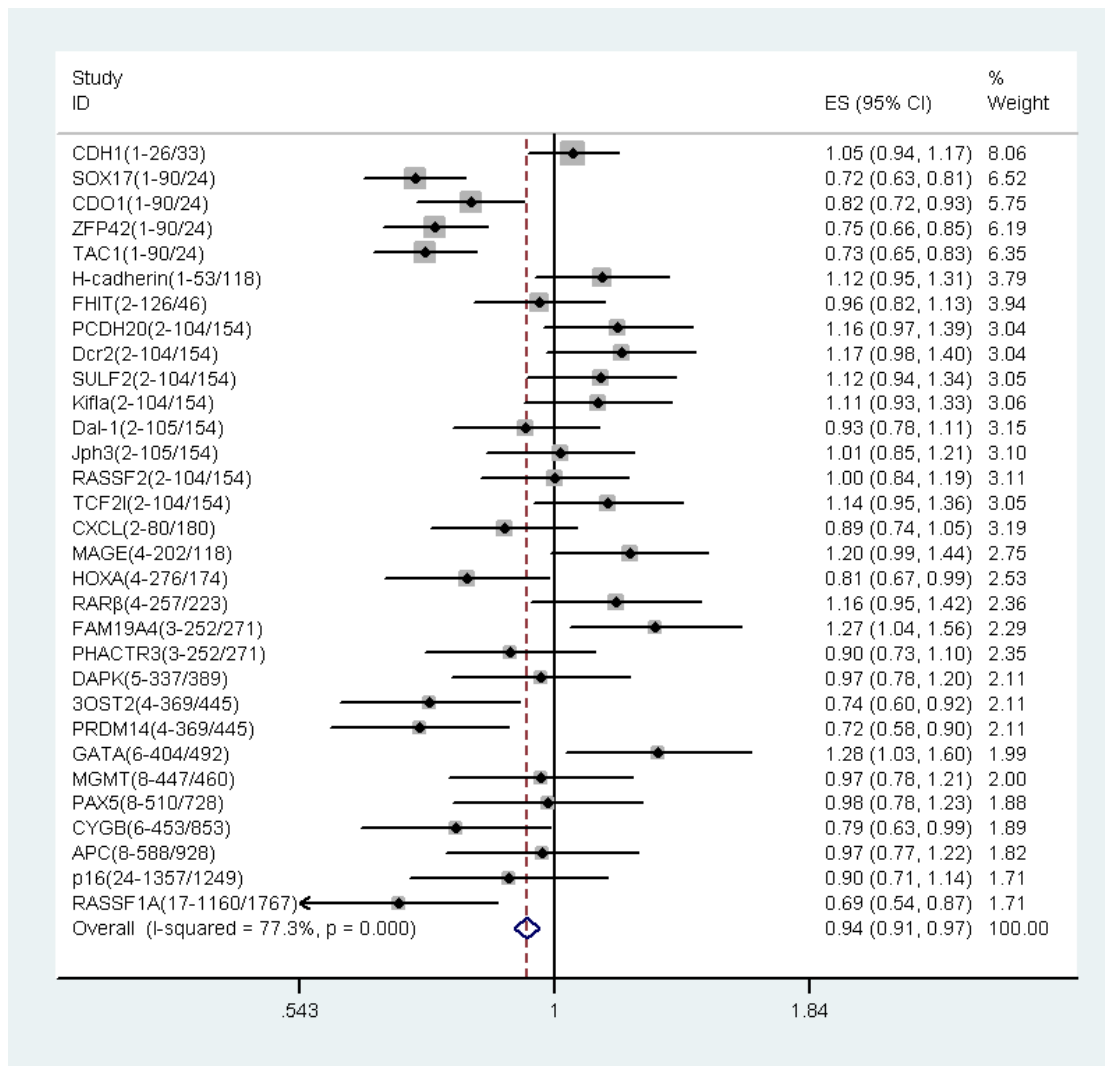

**Figure S9.** The diagnostic accuracy of *9/Dab2* compared with the other 31 methylated genes. OR >1 means that *9/Dab2* had a higher diagnostic accuracy, and 95% CI excluding 1 was considered significant.

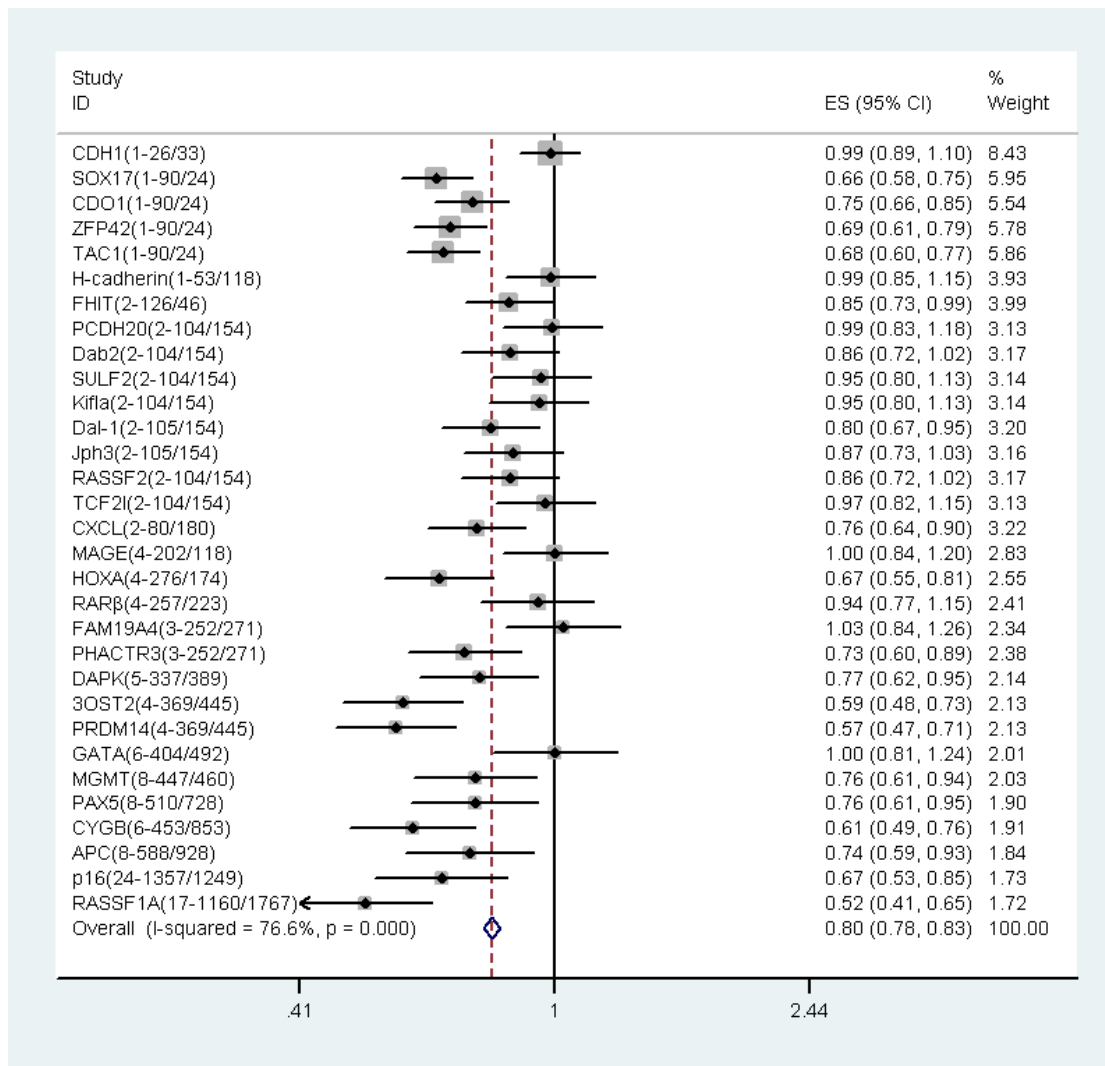

**Figure S10.** The diagnostic accuracy of 10/*Dcr2* compared with the other 31 methylated genes. OR >1 means that 10/*Dcr2* had a higher diagnostic accuracy, and 95% CI excluding 1 was considered significant.

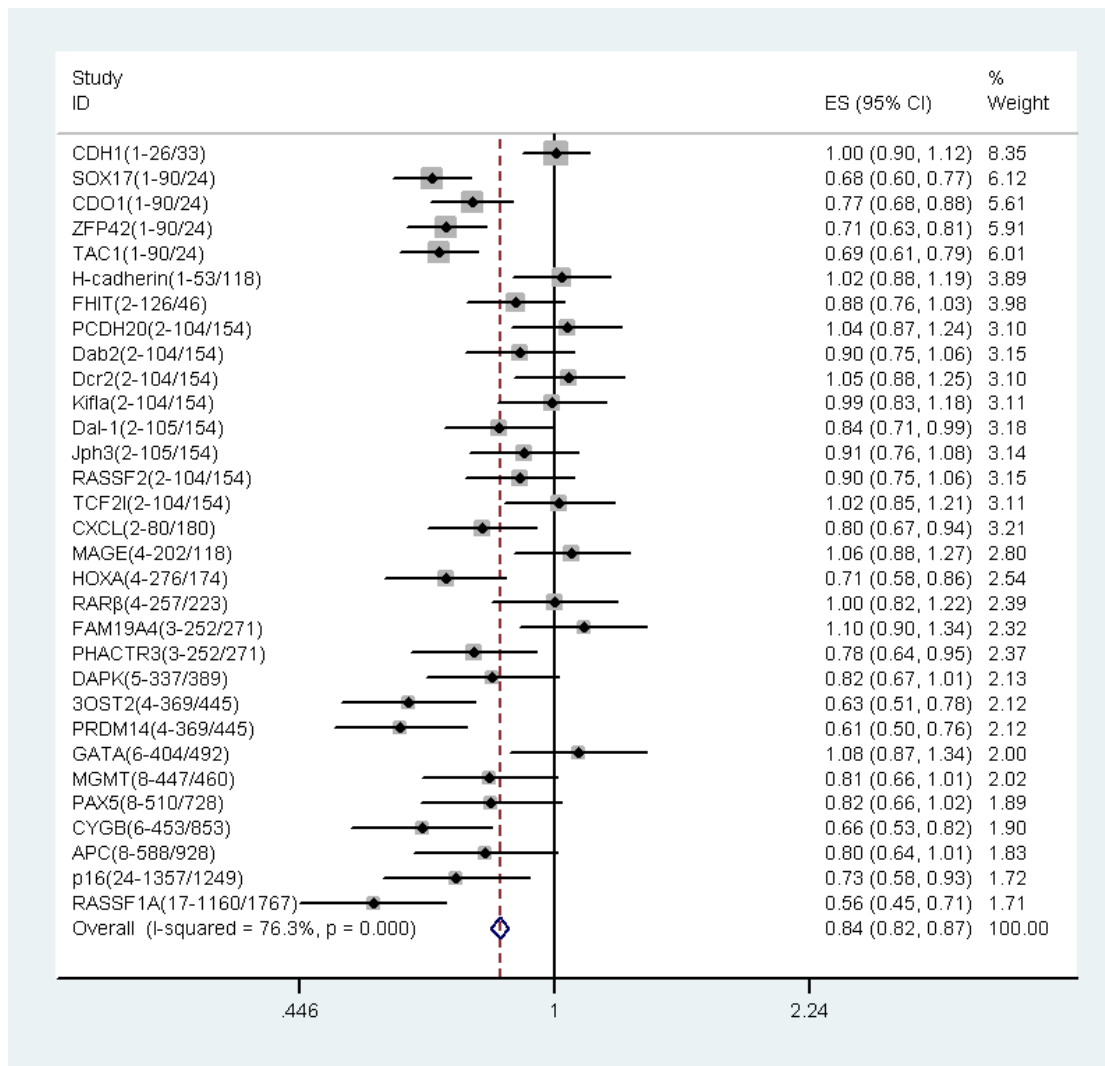

**Figure S11.** The diagnostic accuracy of 11/*SULF2* compared with the other 31 methylated genes. OR >1 means that 11/*SULF2* had a higher diagnostic accuracy, and 95% CI excluding 1 was considered significant.

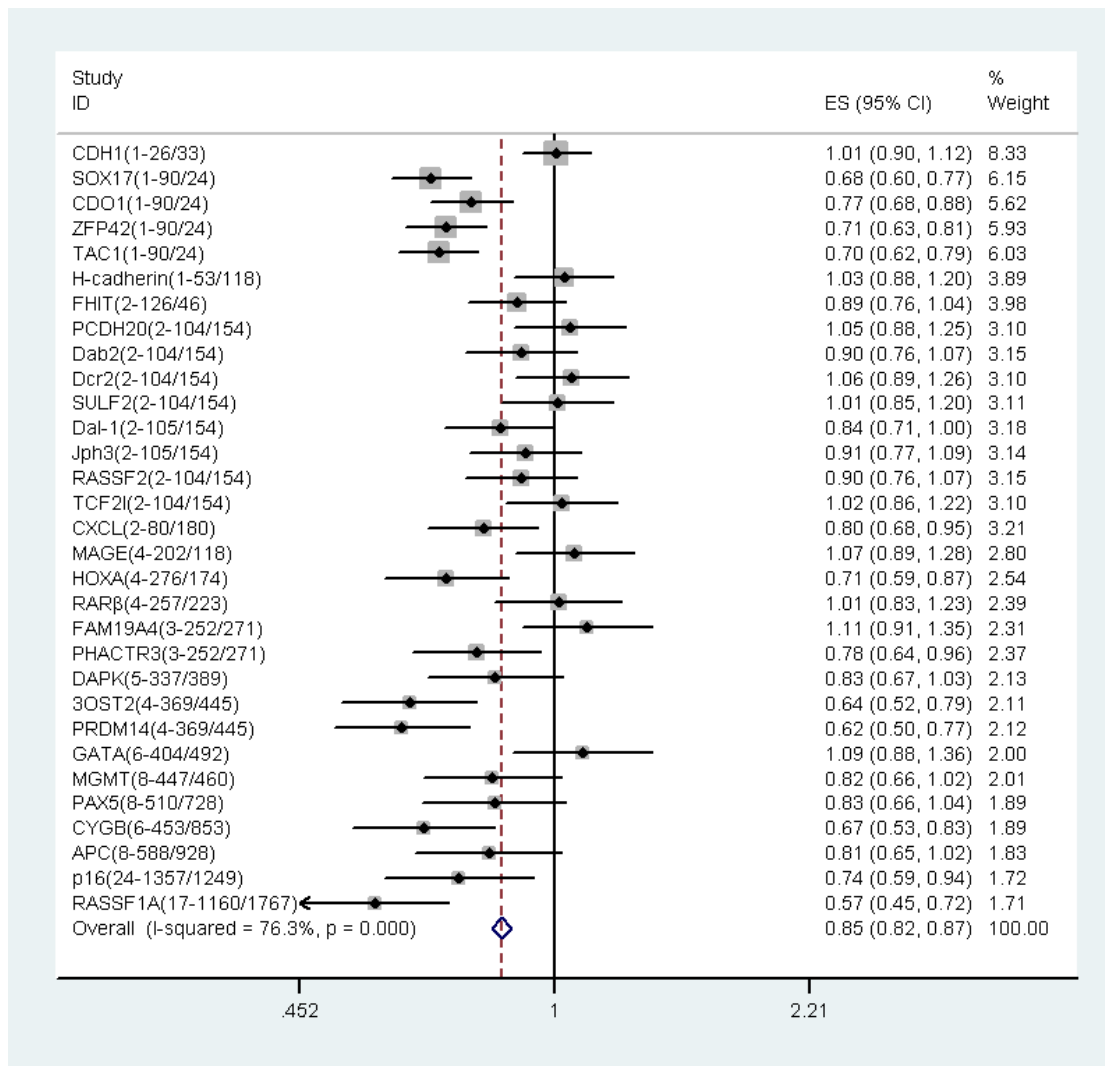

**Figure S12.** The diagnostic accuracy of 12/*Kifla* compared with the other 31 methylated genes. OR >1 means that 12/*Kifla* had a higher diagnostic accuracy, and 95% CI excluding 1 was considered significant.

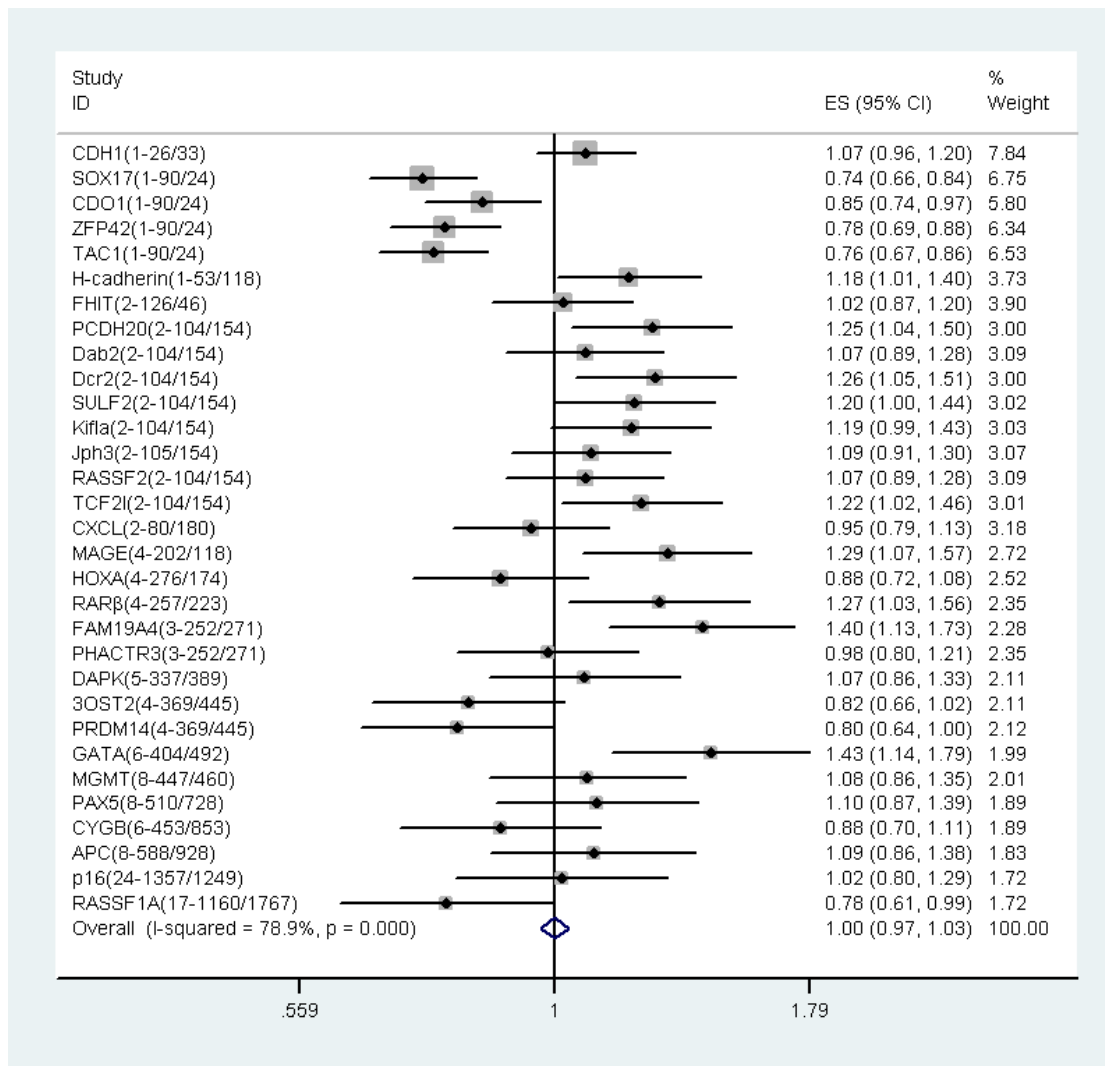

**Figure S13.** The diagnostic accuracy of 13/*Dal-1* compared with the other 31 methylated genes. OR >1 means that 13/*Dal-1* had a higher diagnostic accuracy, and 95% CI excluding 1 was considered significant.

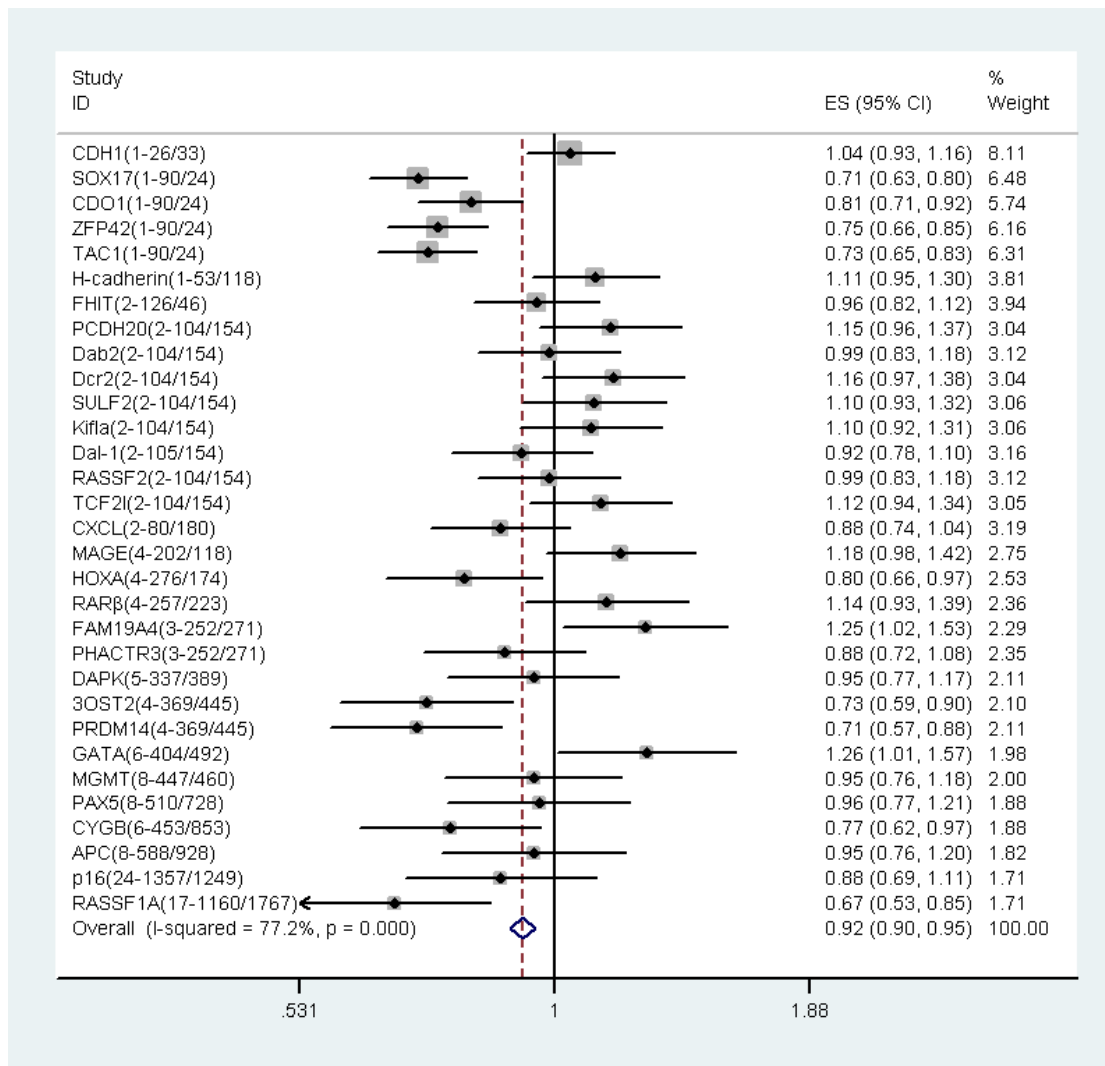

**Figure S14.** The diagnostic accuracy of 14/*Jph3* compared with the other 31 methylated genes. OR >1 means that 14/*Jph3* had a higher diagnostic accuracy, and 95% CI excluding 1 was considered significant.

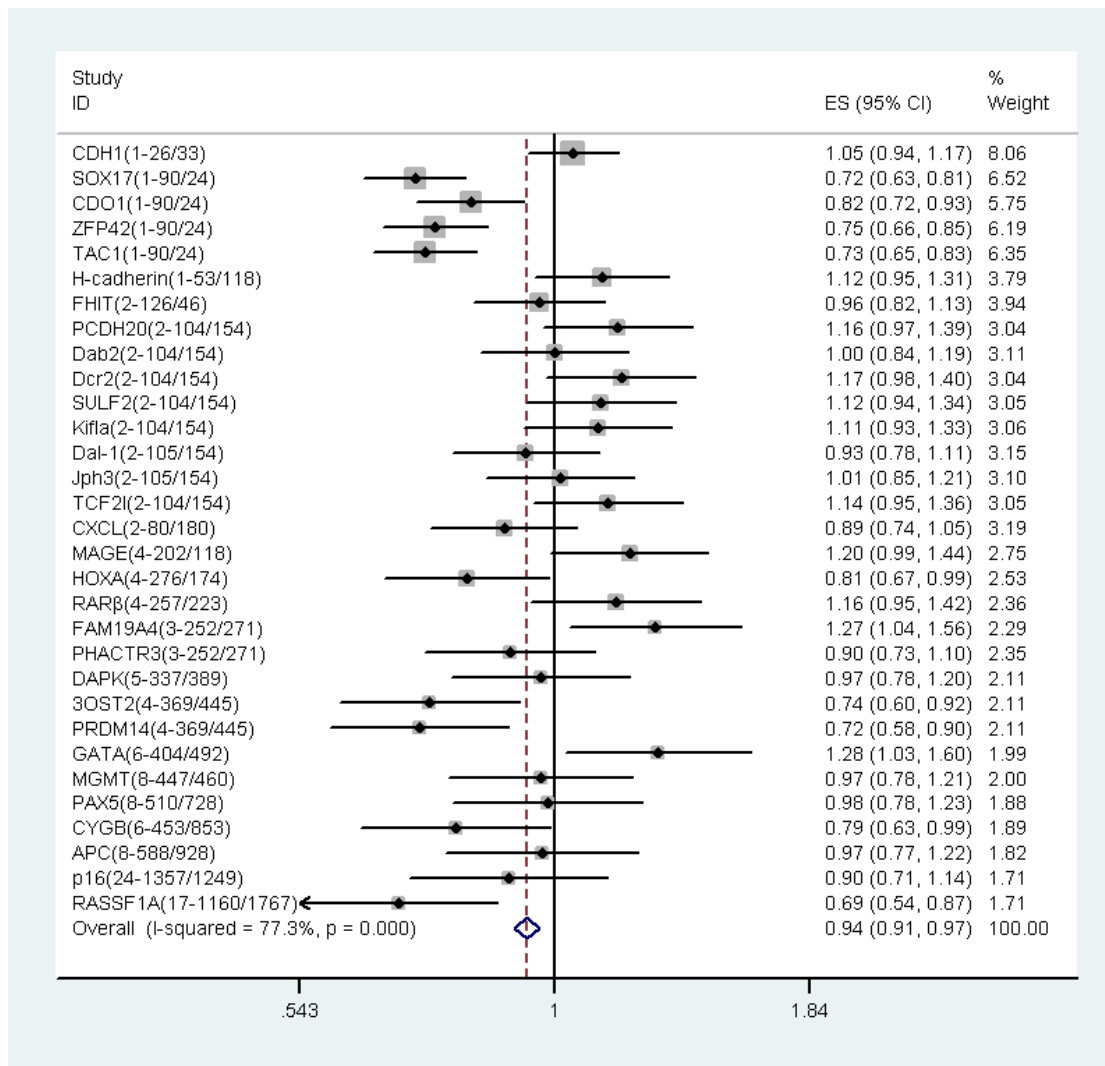

**Figure S15.** The diagnostic accuracy of 15/*RASSF2* compared with the other 31 methylated genes. OR >1 means that 15/*RASSF2* had a higher diagnostic accuracy, and 95% CI excluding 1 was considered significant.

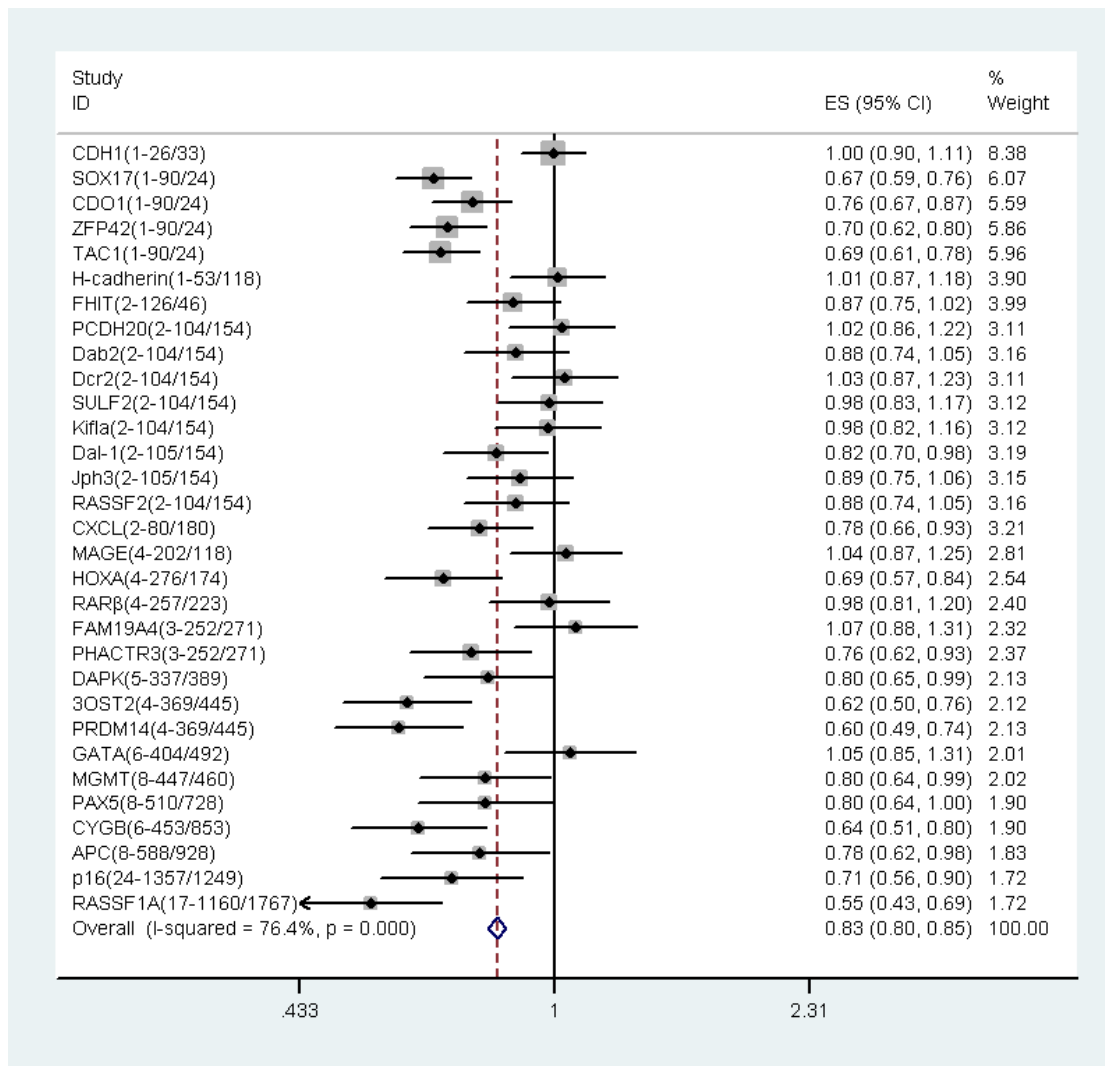

**Figure S16.** The diagnostic accuracy of 16/*TCF2l* compared with the other 31 methylated genes. OR >1 means that 16/*TCF2l* had a higher diagnostic accuracy, and 95% CI excluding 1 was considered significant.



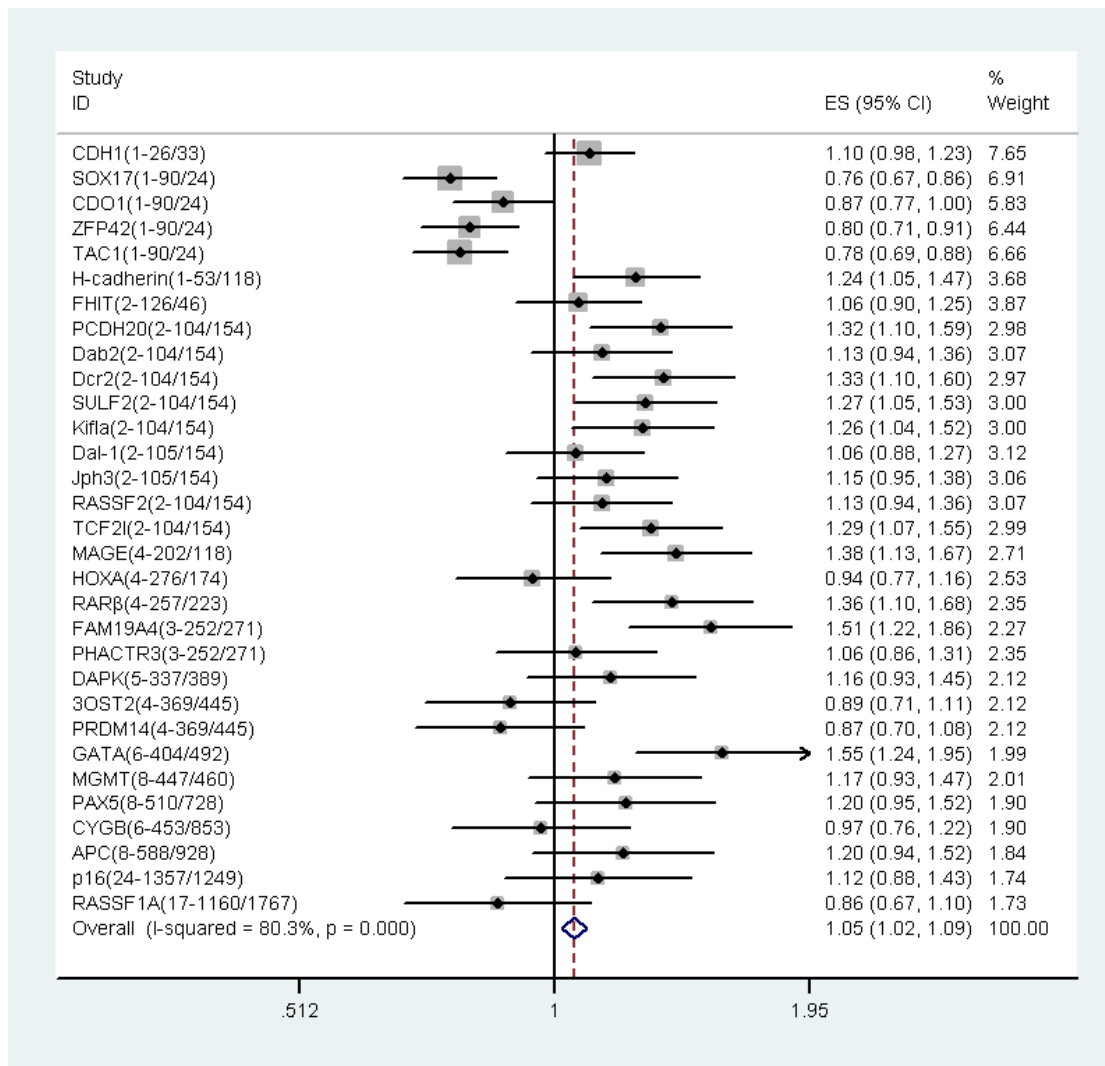

**Figure S17.** The diagnostic accuracy of 17/*CXCL* compared with the other 31 methylated genes. OR >1 means that 17/*CXCL* had a higher diagnostic accuracy, and 95% CI excluding 1 was considered significant.

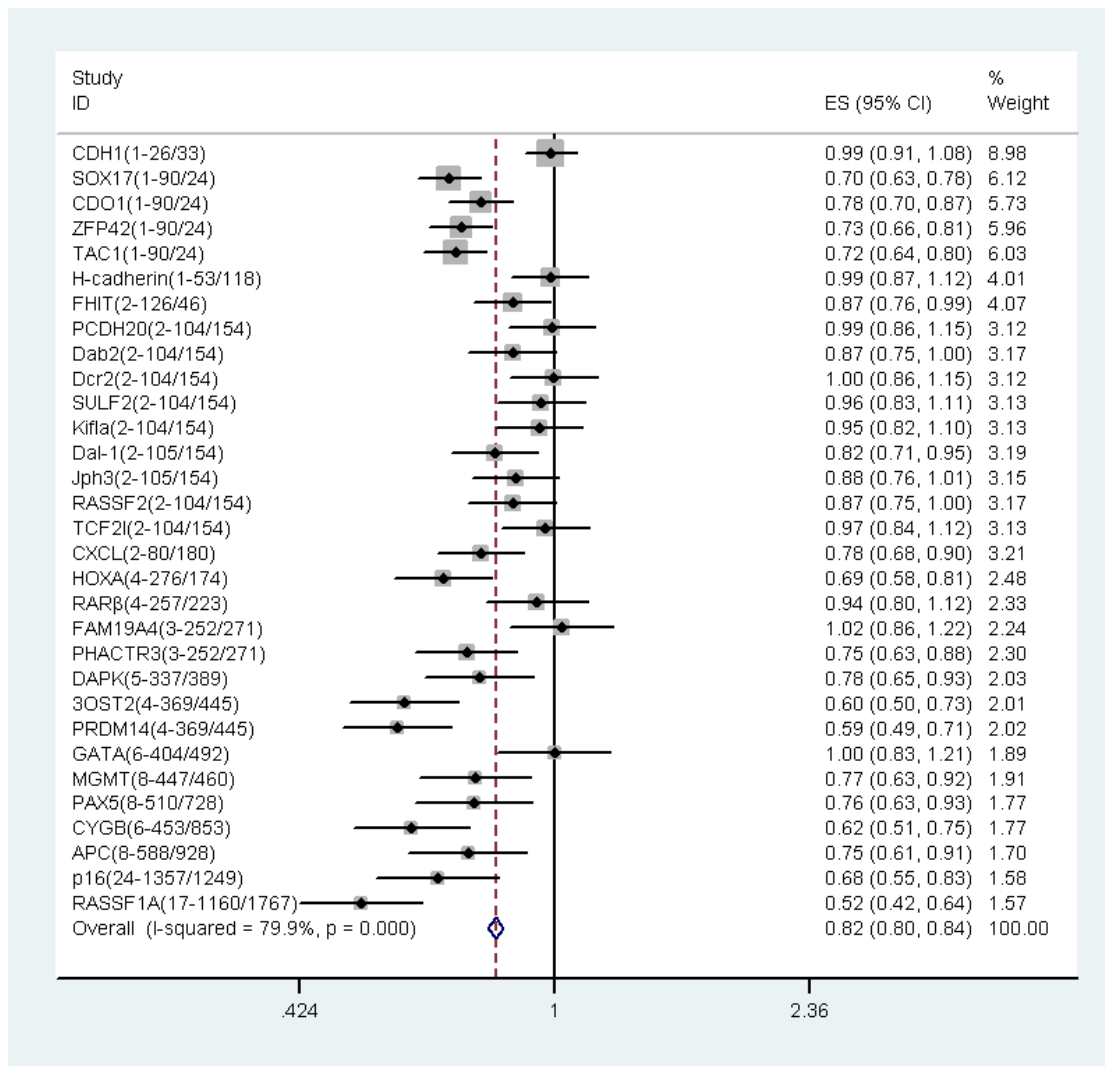

**Figure S18.** The diagnostic accuracy of 18/*MAGE* compared with the other 31 methylated genes. OR >1 means that 18/*MAGE* had a higher diagnostic accuracy, and 95% CI excluding 1 was considered significant.

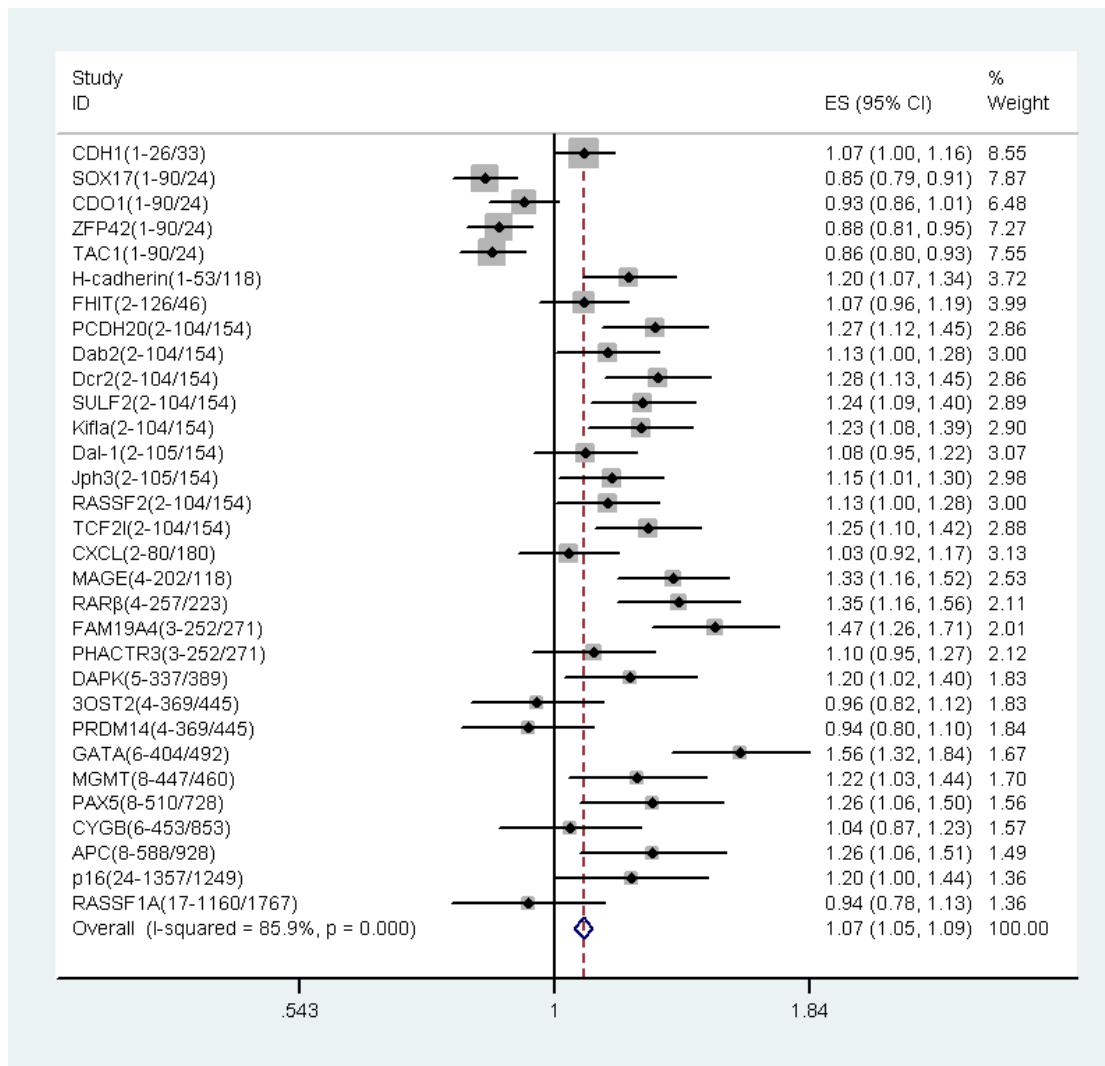

**Figure S19.** The diagnostic accuracy of 19/*HOXA* compared with the other 31 methylated genes. OR >1 means that 19/*HOXA* had a higher diagnostic accuracy, and 95% CI excluding 1 was considered significant.

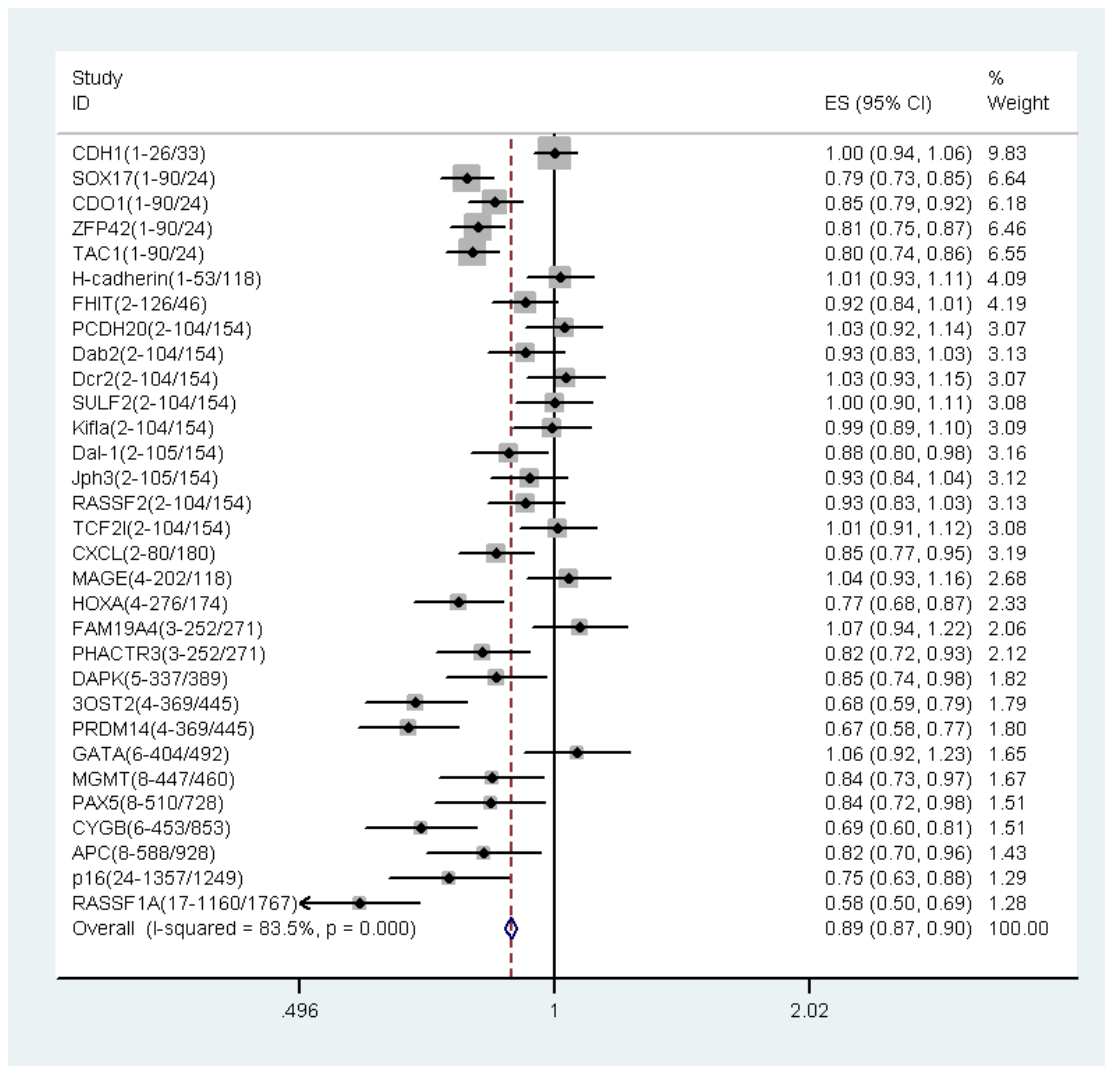

**Figure S20.** The diagnostic accuracy of *20/RARβ* compared with the other 31 methylated genes. OR >1 means that *20/RARβ* had a higher diagnostic accuracy, and 95% CI excluding 1 was considered significant.

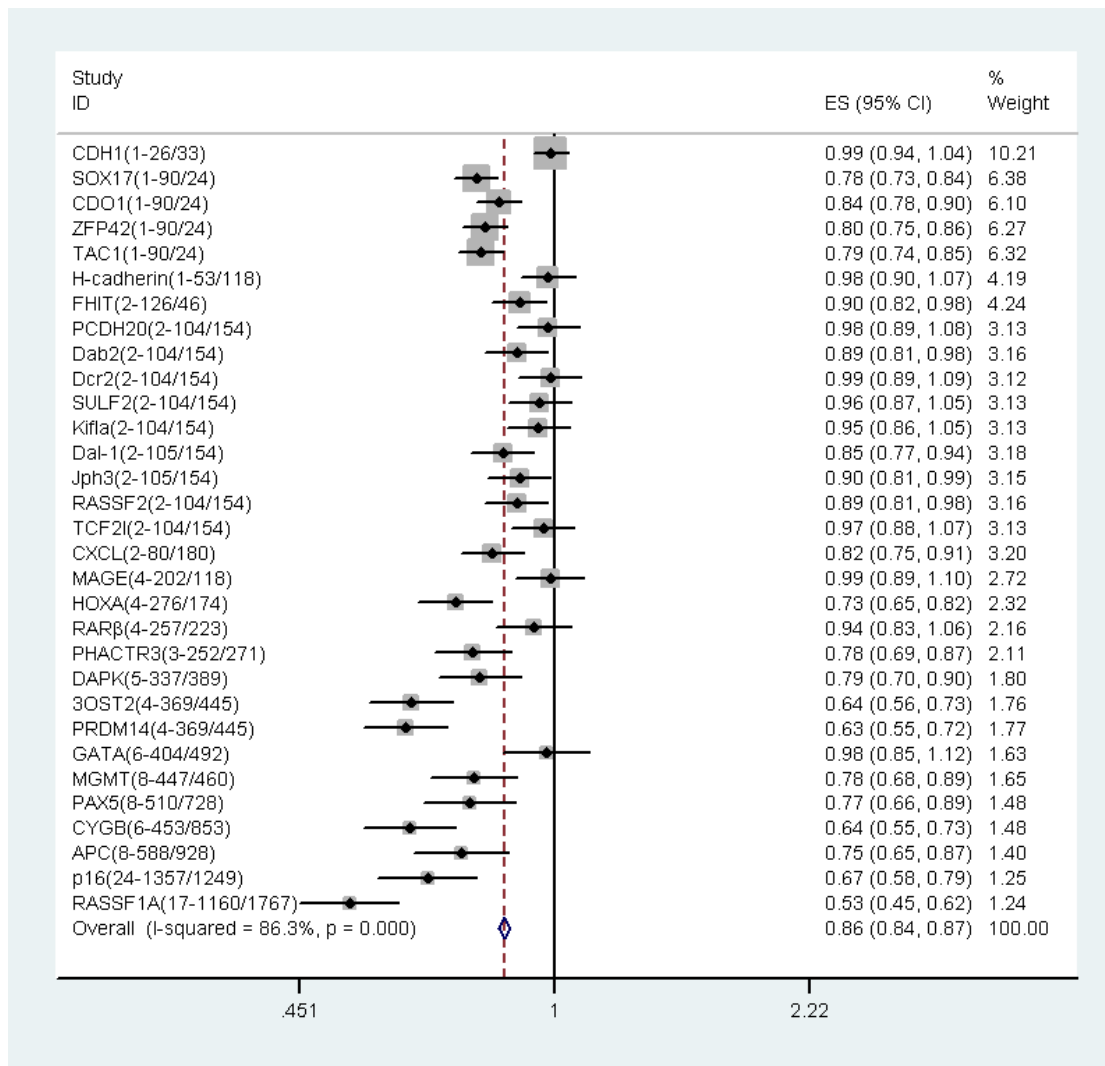

**Figure S21.** The diagnostic accuracy of 21/*FAM19A4* compared with the other 31 methylated genes. OR >1 means that 21/*FAM19A4* had a higher diagnostic accuracy, and 95% CI excluding 1 was considered significant.

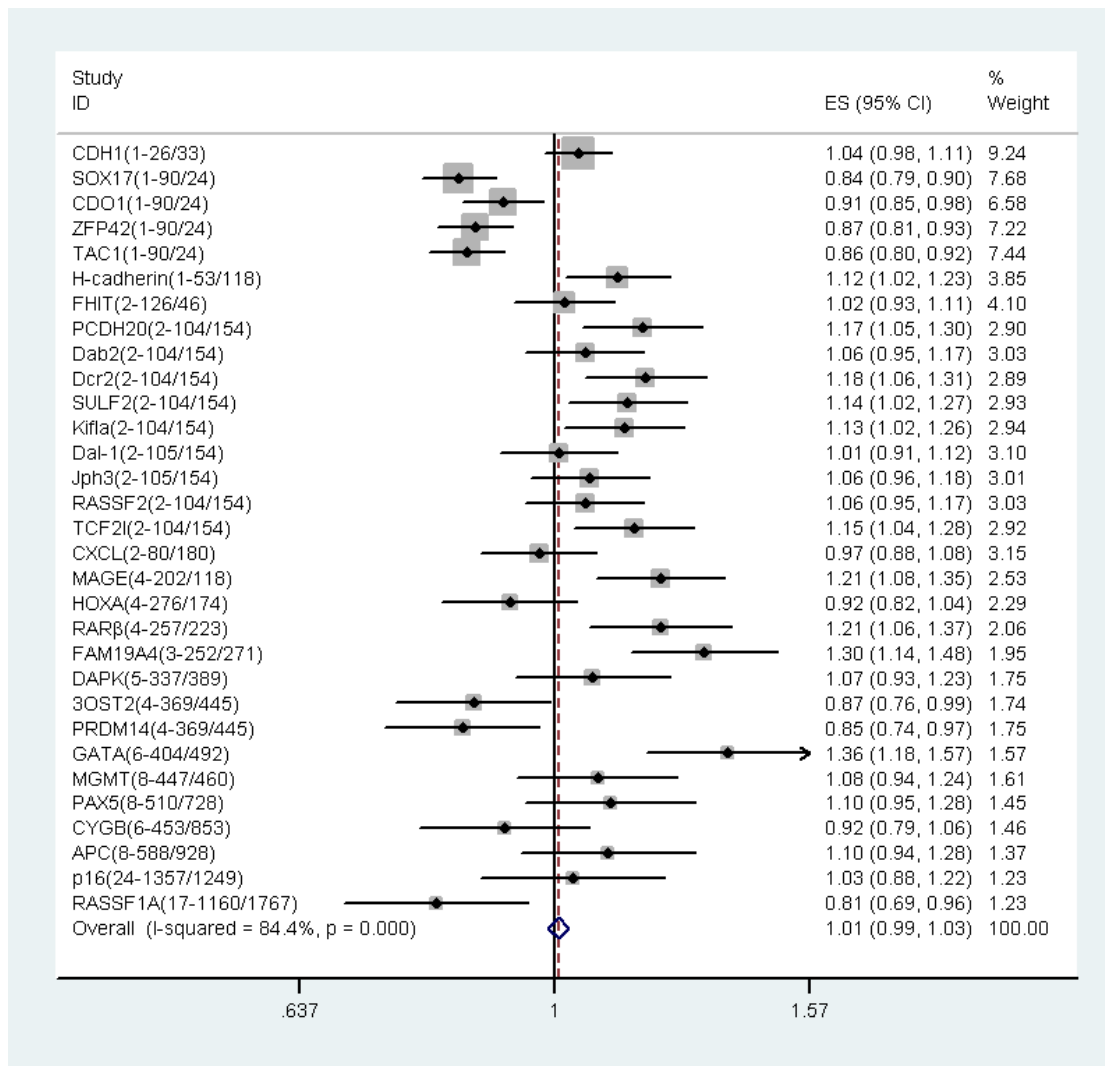

**Figure S22.** The diagnostic accuracy of 22/PHACTR3 compared with the other 31 methylated genes. OR >1 means that 22/PHACTR3 had a higher diagnostic accuracy, and 95% CI excluding 1 was considered significant.

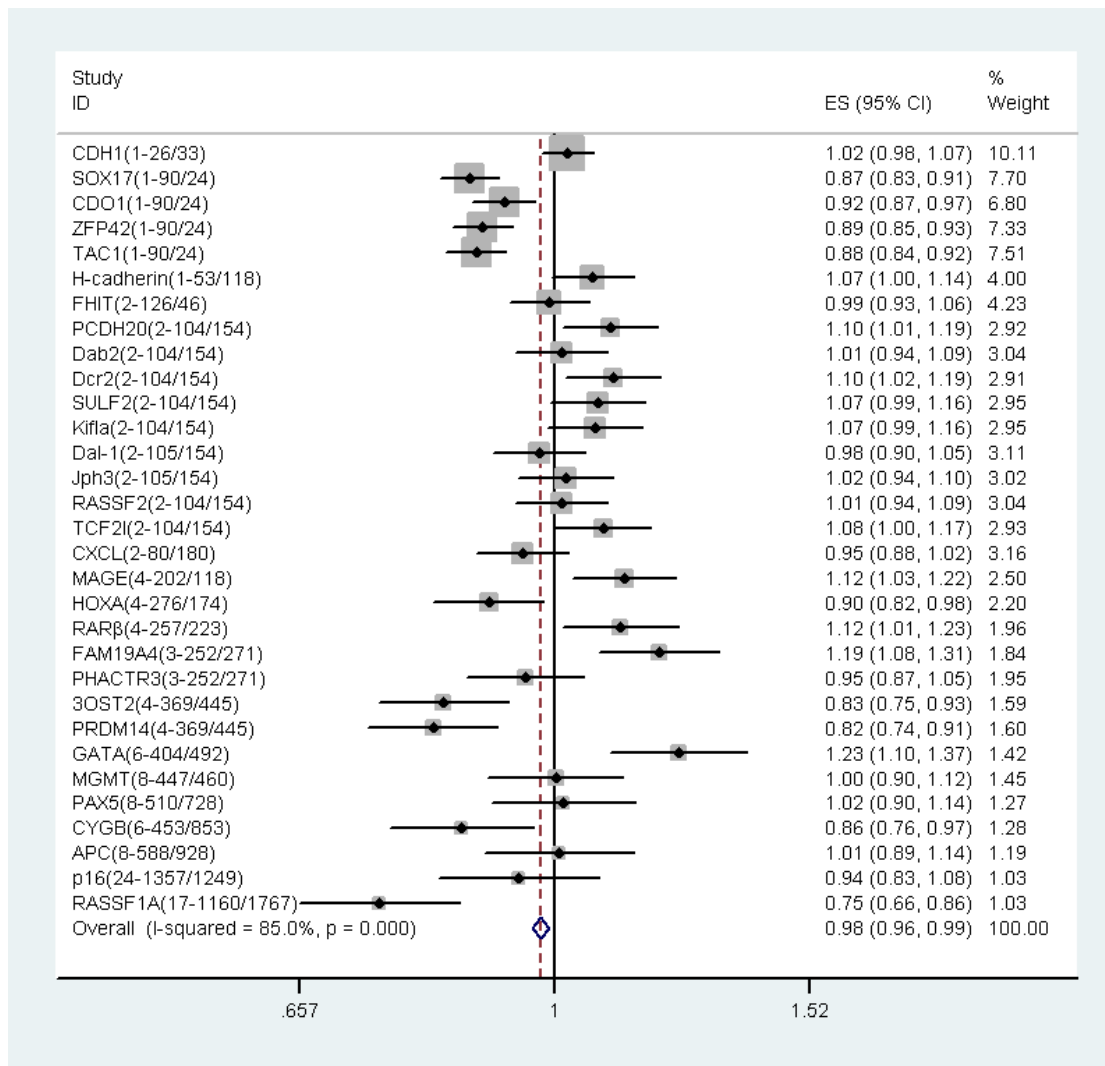

**Figure S23.** The diagnostic accuracy of 23/DAPK compared with the other 31 methylated genes. OR >1 means that 23/DAPK had a higher diagnostic accuracy, and 95% CI excluding 1 was considered significant.

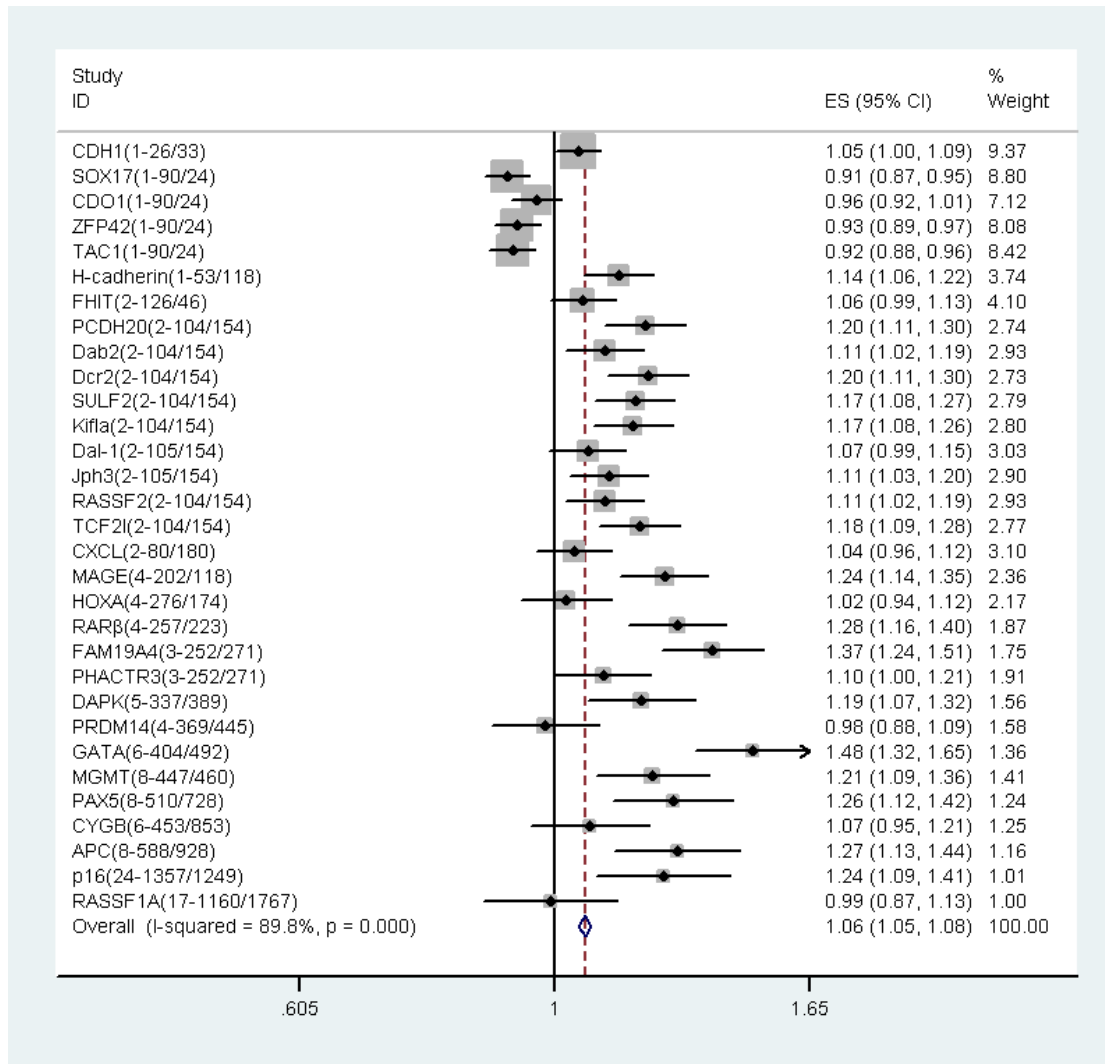

**Figure S24.** The diagnostic accuracy of *24/3OST2* compared with the other 28 methylated genes. OR >1 means that *24/3OST2* had a higher diagnostic accuracy, and 95% CI excluding 1 was considered significant.



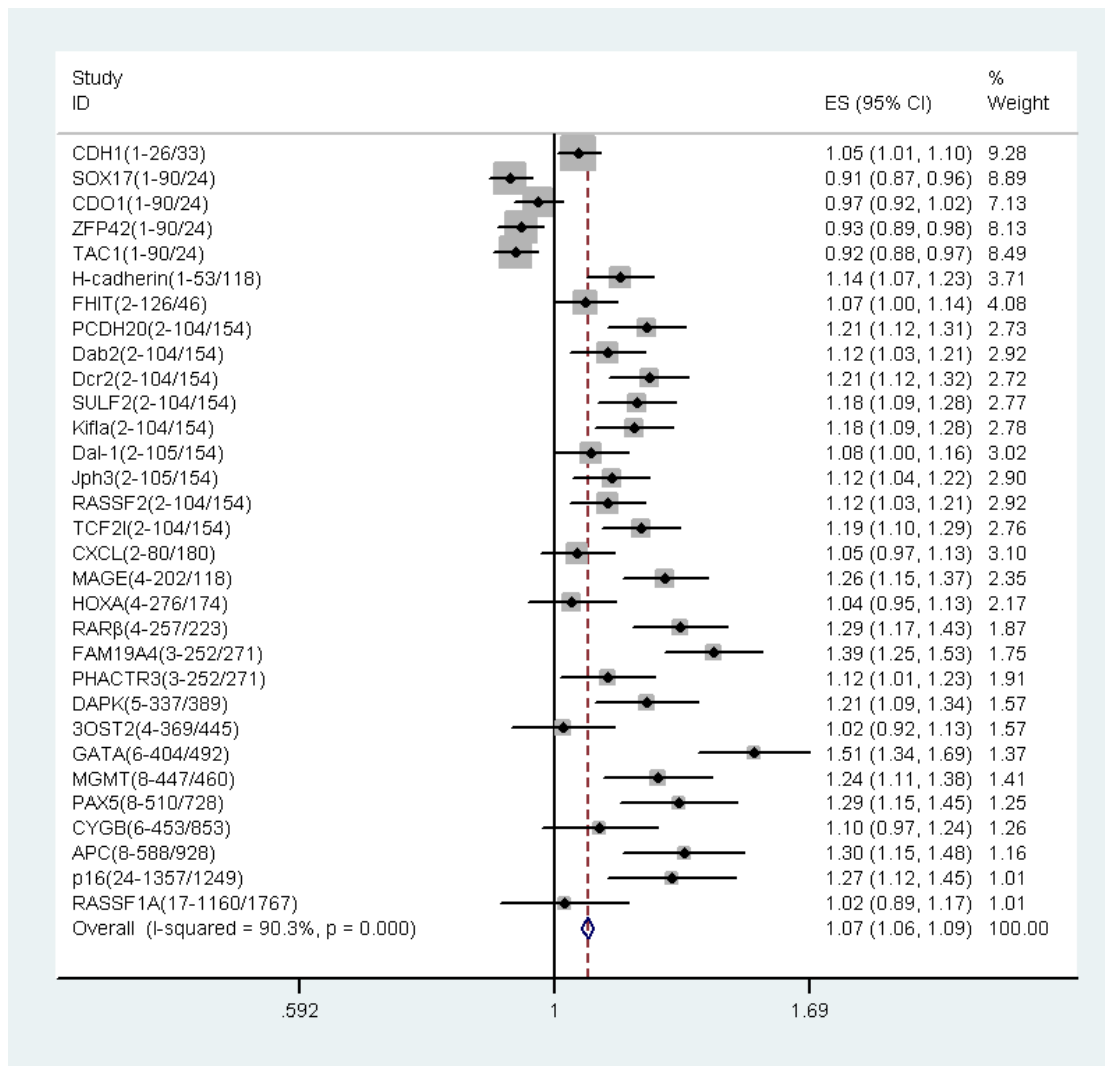

**Figure S25.** The diagnostic accuracy of *25/PRDM14* compared with the other 31 methylated genes. OR >1 means that *25/PRDM14* had a higher diagnostic accuracy, and 95% CI excluding 1 was considered significant.

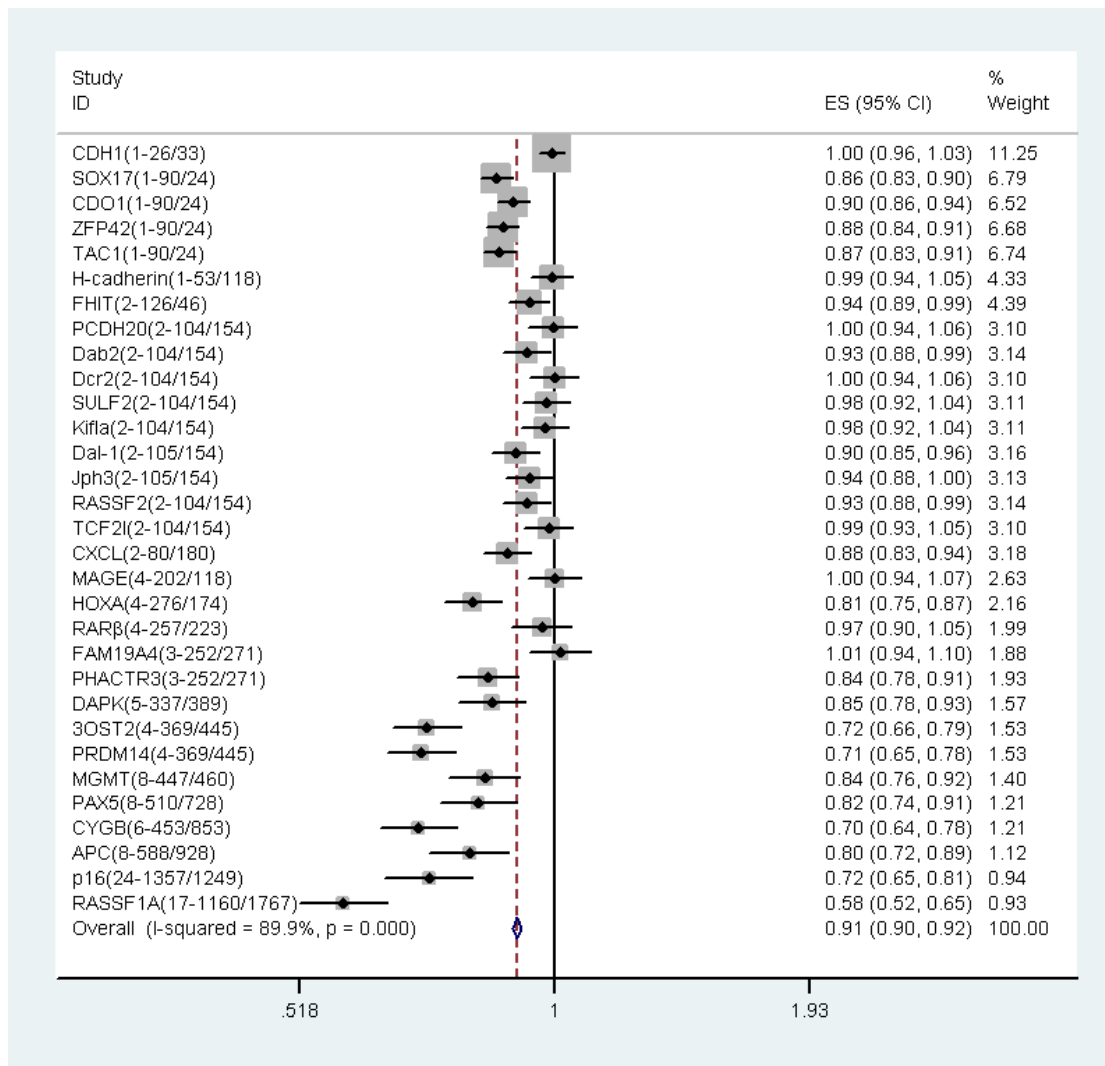

**Figure S26.** The diagnostic accuracy of 26/*GATA* compared with the other 31 methylated genes. OR >1 means that 31/*GATA* had a higher diagnostic accuracy, and 95% CI excluding 1 was considered significant.

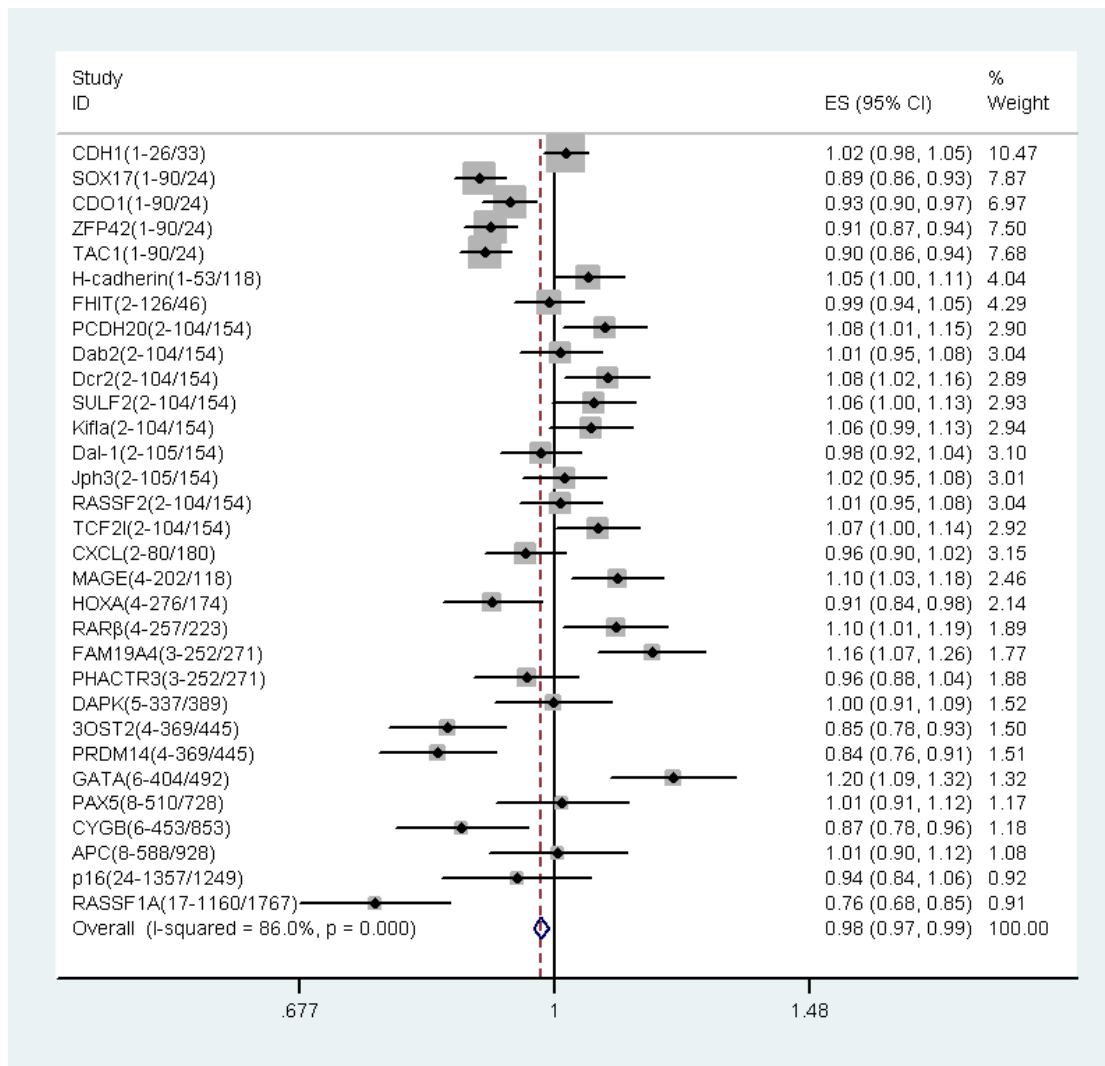

**Figure S27.** The diagnostic accuracy of *27/MGMT* compared with the other 31 methylated genes. OR >1 means that *27/MGMT* had a higher diagnostic accuracy, and 95% CI excluding 1 was considered significant.

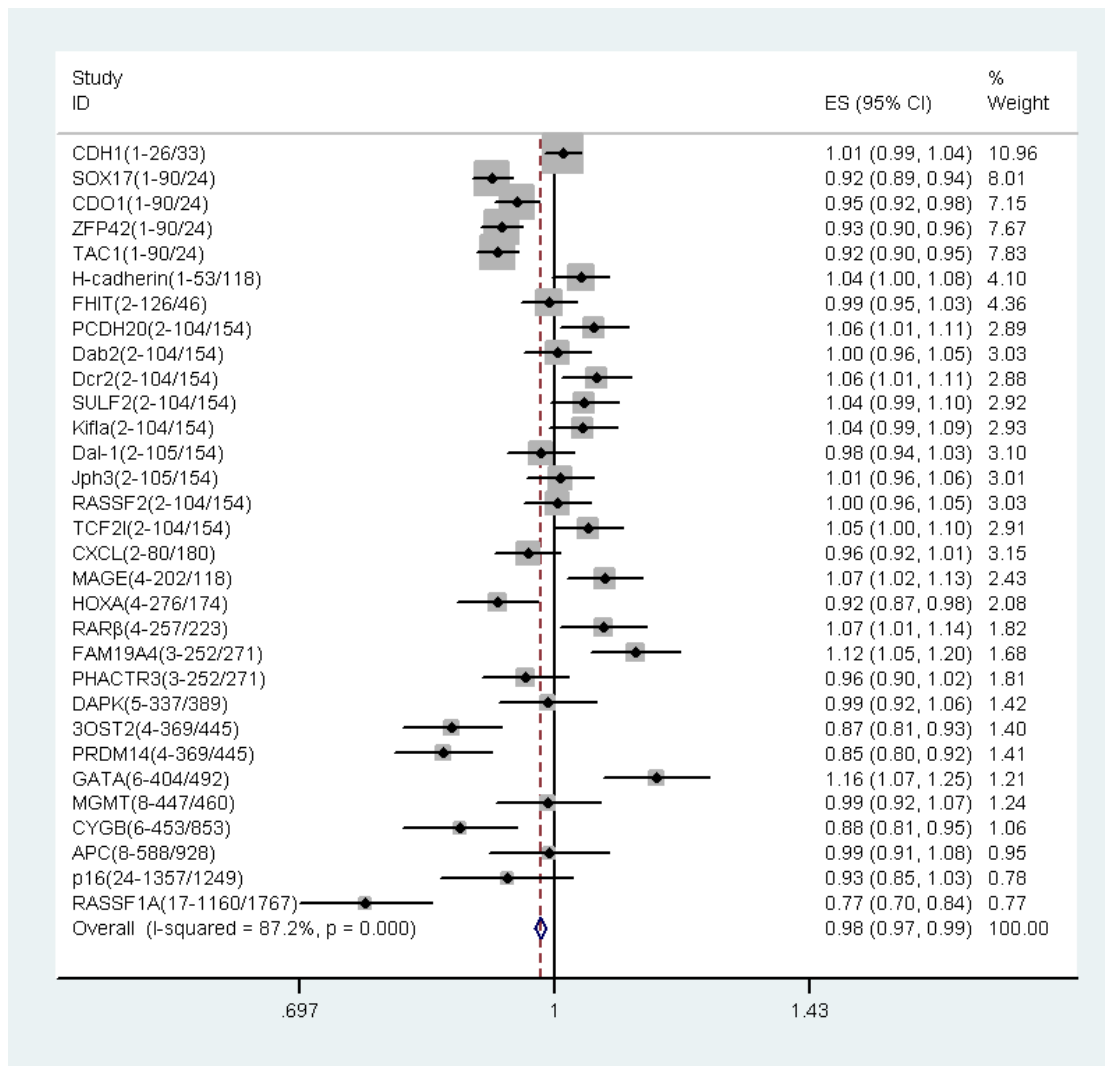

**Figure S28.** The diagnostic accuracy of 28/*PAX5* compared with the other 31 methylated genes. OR >1 means that 28/*PAX5* had a higher diagnostic accuracy, and 95% CI excluding 1 was considered significant.

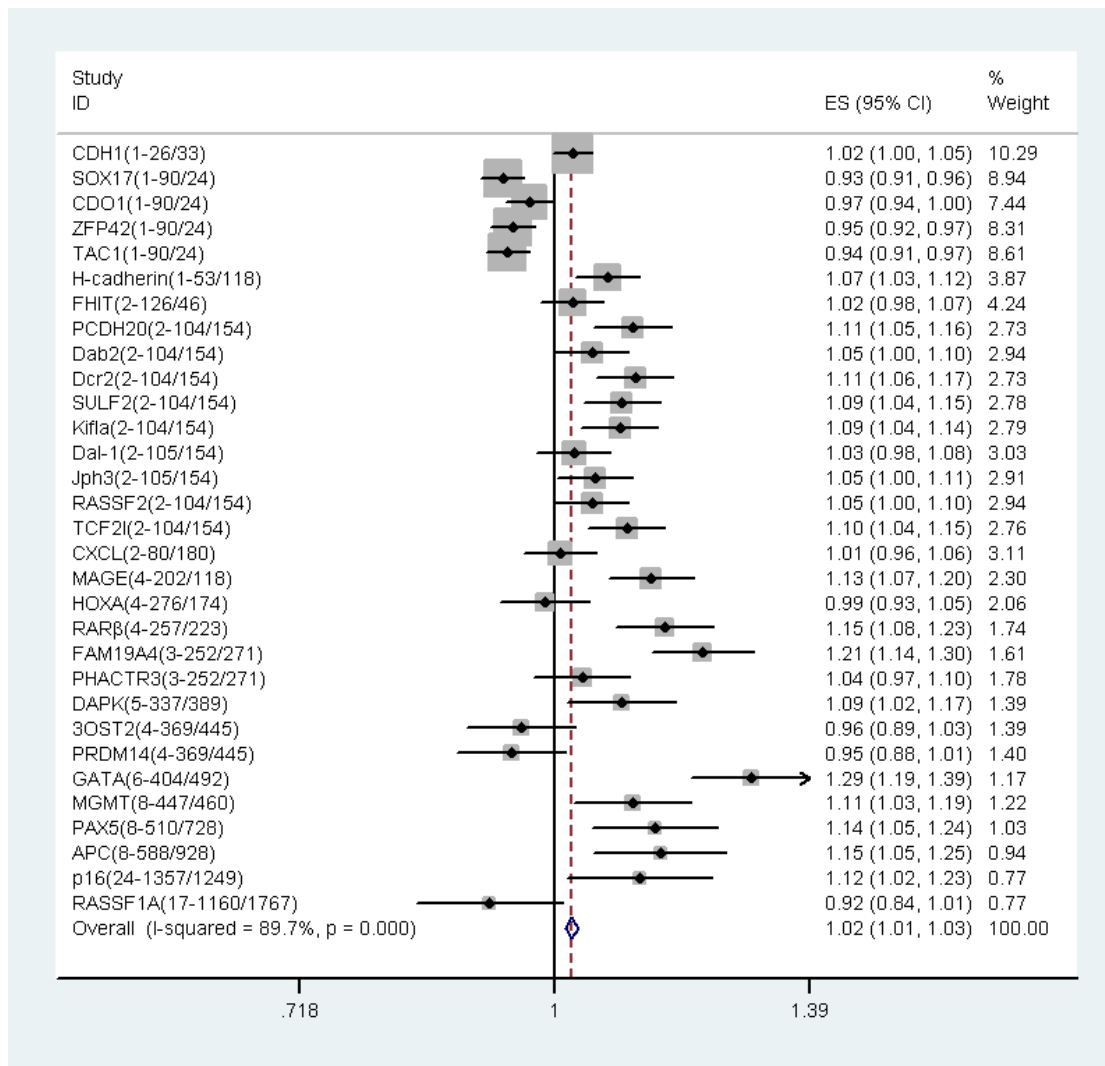

**Figure S29.** The diagnostic accuracy of 29/*CYGB* compared with the other 31 methylated genes. OR >1 means that 29/*CYGB* had a higher diagnostic accuracy, and 95% CI excluding 1 was considered significant.

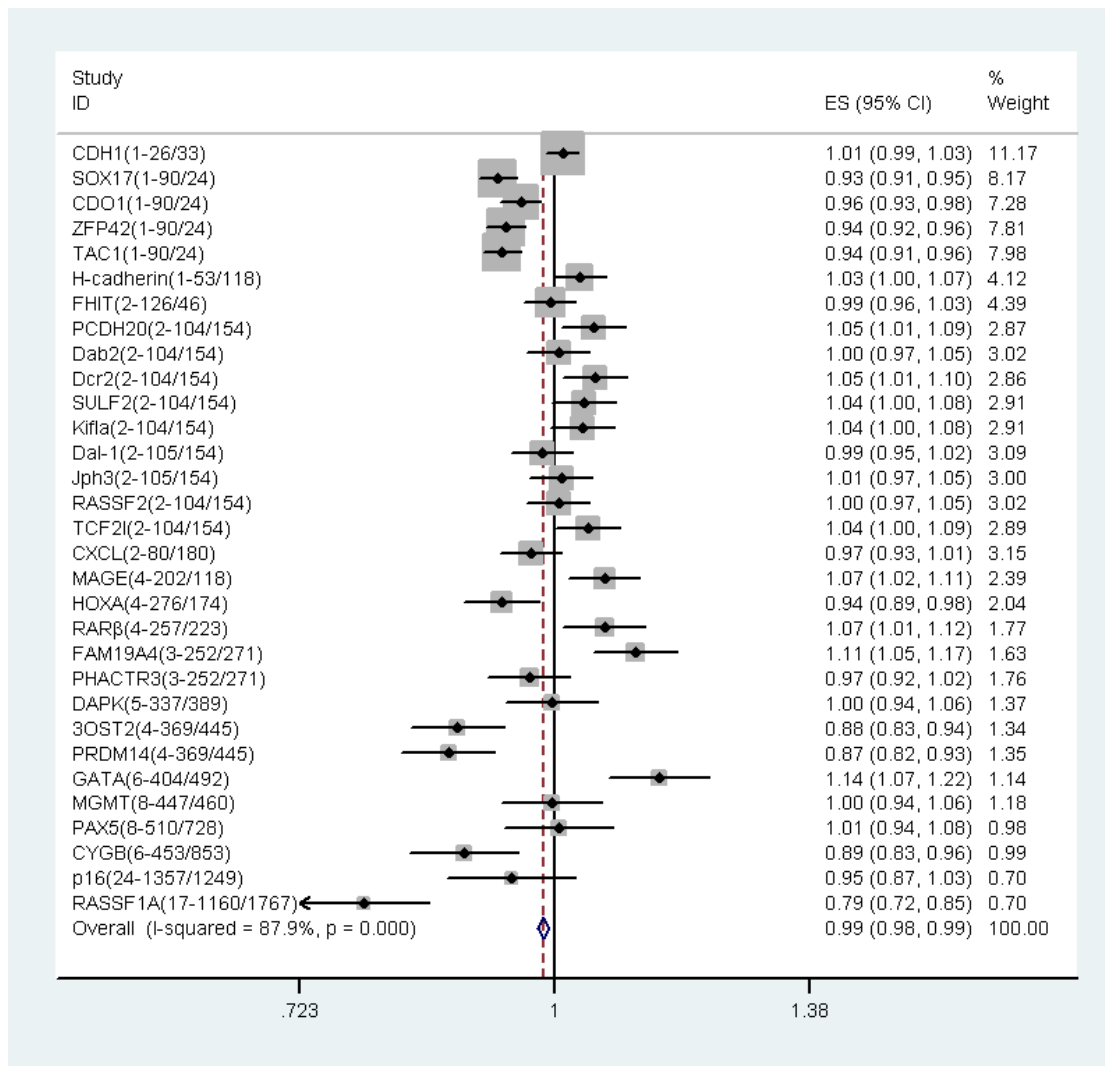

**Figure S30.** The diagnostic accuracy of 30/APC compared with the other 31 methylated genes. OR >1 means that 30/APC had a higher diagnostic accuracy, and 95% CI excluding 1 was considered significant.

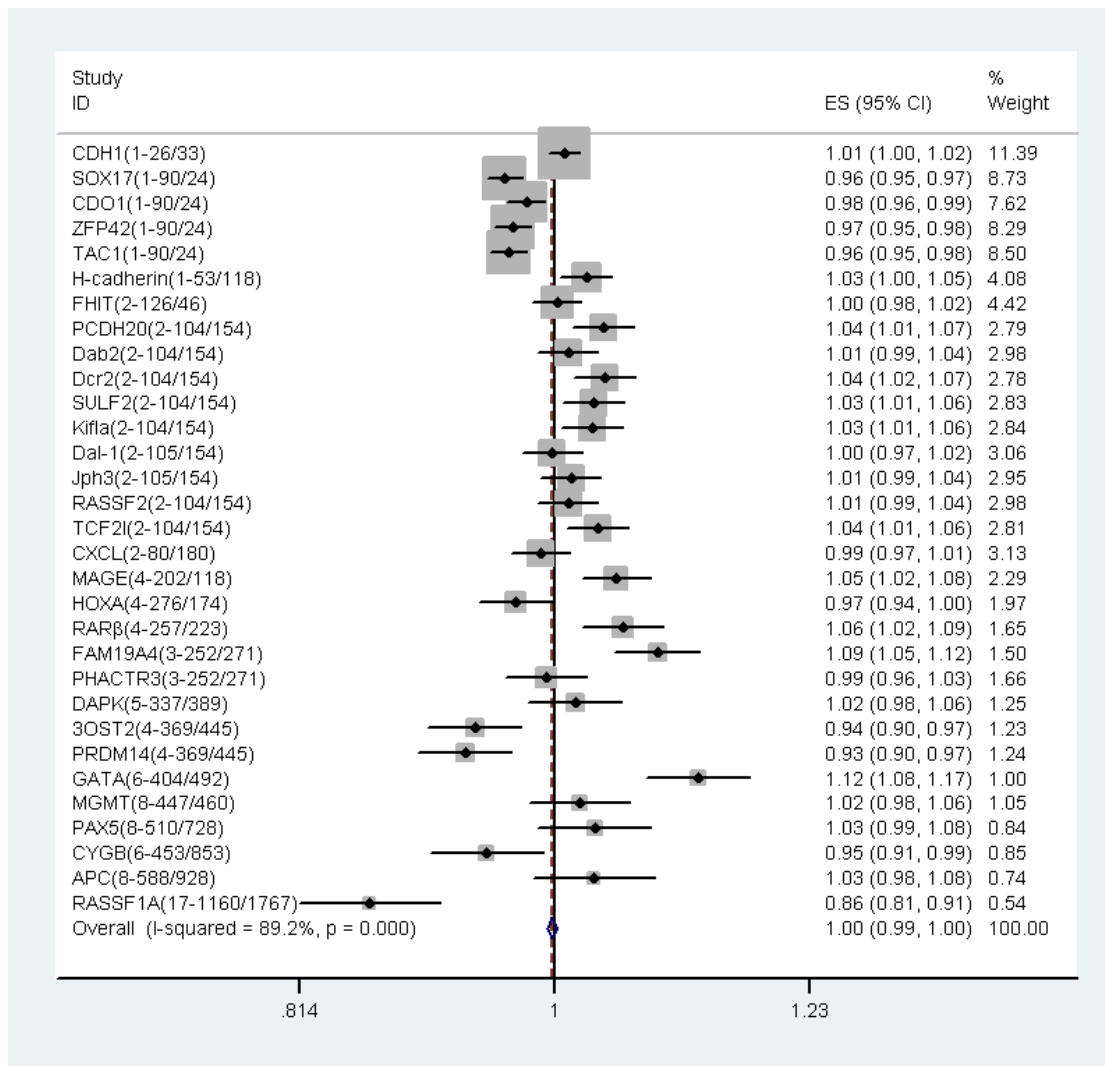

**Figure S31.** The diagnostic accuracy of 31/*p16* compared with the other 31 methylated genes. OR >1 means that 31/*p16* had a higher diagnostic accuracy, and 95% CI excluding 1 was considered significant.

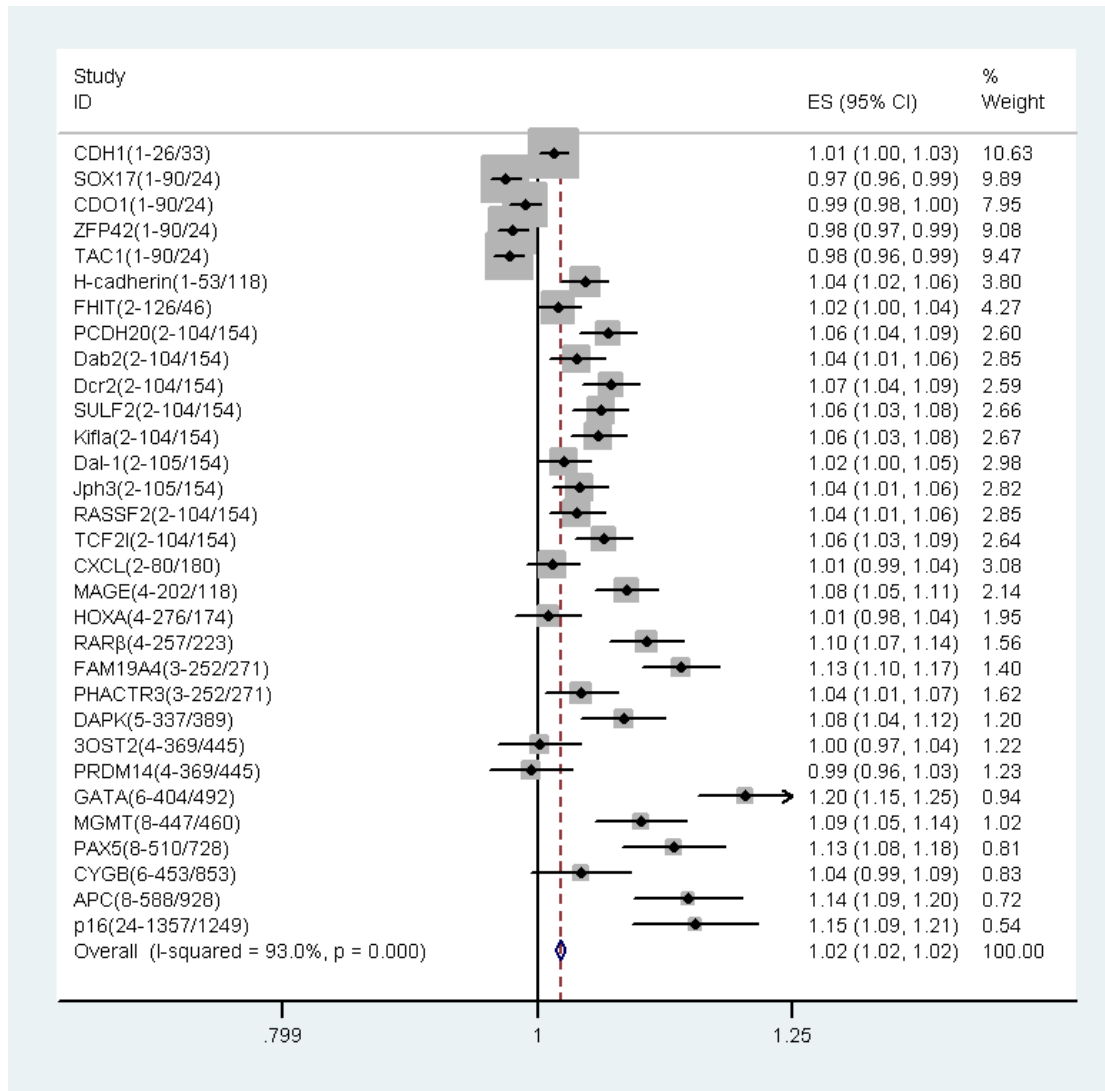

**Figure S32.** The diagnostic accuracy of 32/*RASSF1A* compared with the other 31 methylated genes. OR >1 means that 32/*RASSF1A* had a higher diagnostic accuracy, and 95% CI excluding 1 was considered significant.



**Table S1.** Indirect comparisons of 32 genes.

|                   |                 |                   |                  |                  |                   |                 |                 |                 |                 |                 |                 |                 |                 |                 |                 |                 |                 |                 |                 |                 |                 |                 |                 |                 |                 |                 |                 |                 |                 |                 |                 |
|-------------------|-----------------|-------------------|------------------|------------------|-------------------|-----------------|-----------------|-----------------|-----------------|-----------------|-----------------|-----------------|-----------------|-----------------|-----------------|-----------------|-----------------|-----------------|-----------------|-----------------|-----------------|-----------------|-----------------|-----------------|-----------------|-----------------|-----------------|-----------------|-----------------|-----------------|-----------------|
| <i>CDH1</i>       | 4.81(2.33-9.96) | 2.59(1.33-5.05)   | 3.74(1.86-7.51)  | 4.22(2.07-8.59)  | 0.38(0.21-0.70)   | 1.38(0.76-2.56) | 0.94(0.53-1.66) | 1.27(0.72-2.24) | 0.93(0.53-1.63) | 1.02(0.58-1.79) | 1.03(0.59-1.82) | 1.46(0.82-2.58) | 1.24(0.70-2.19) | 1.26(0.72-2.24) | 0.98(0.56-1.74) | 1.62(0.91-2.87) | 0.92(0.53-1.61) | 1.77(1.03-3.07) | 1.01(0.59-1.74) | 0.89(0.52-1.52) | 1.49(0.87-2.57) | 1.33(0.78-2.27) | 1.89(1.11-3.23) | 1.96(1.15-3.34) | 0.92(0.54-1.57) | 1.32(0.78-2.25) | 1.30(0.77-2.19) | 1.69(1.00-2.86) | 1.31(0.78-2.21) | 1.43(0.85-2.41) | 1.91(1.14-3.21) |
| <i>SOX1</i>       | 0.21(0.10-0.43) | 0.54(0.28-1.05)   | 0.78(0.39-1.56)  | 0.88(0.43-1.79)  | 0.08(0.04-0.15)   | 0.29(0.16-0.53) | 0.20(0.11-0.35) | 0.26(0.15-0.47) | 0.19(0.11-0.34) | 0.21(0.12-0.37) | 0.21(0.12-0.38) | 0.30(0.17-0.54) | 0.26(0.15-0.46) | 0.26(0.15-0.47) | 0.20(0.12-0.36) | 0.34(0.19-0.60) | 0.19(0.11-0.33) | 0.37(0.21-0.64) | 0.21(0.12-0.36) | 0.18(0.11-0.32) | 0.31(0.18-0.53) | 0.28(0.16-0.47) | 0.39(0.23-0.67) | 0.41(0.24-0.70) | 0.19(0.11-0.33) | 0.28(0.16-0.47) | 0.27(0.16-0.46) | 0.35(0.21-0.60) | 0.27(0.16-0.46) | 0.30(0.18-0.50) | 0.40(0.24-0.67) |
| <i>CDO1</i>       | 0.39(0.20-0.75) | 1.86(0.95-3.63)   | 1.44(0.76-2.73)  | 1.63(0.85-3.12)  | 0.15(0.09-0.25)   | 0.56(0.32-0.91) | 0.36(0.22-0.59) | 0.49(0.30-0.80) | 0.36(0.22-0.58) | 0.39(0.24-0.64) | 0.40(0.24-0.65) | 0.56(0.34-0.92) | 0.48(0.29-0.78) | 0.49(0.30-0.80) | 0.38(0.23-0.62) | 0.63(0.38-1.03) | 0.36(0.22-0.57) | 0.68(0.43-1.10) | 0.39(0.24-0.62) | 0.34(0.22-0.54) | 0.58(0.36-0.91) | 0.51(0.33-0.81) | 0.73(0.47-1.15) | 0.76(0.48-1.19) | 0.36(0.23-0.56) | 0.51(0.33-0.80) | 0.50(0.32-0.78) | 0.65(0.42-1.01) | 0.51(0.33-0.79) | 0.55(0.36-0.85) | 0.74(0.48-1.14) |
| <i>ZFP4</i>       | 0.27(0.13-0.54) | 1.29(0.64-2.59)   | 0.69(0.37-1.31)  | 1.13(0.57-2.24)  | 0.10(0.06-0.18)   | 0.37(0.21-0.65) | 0.25(0.15-0.43) | 0.34(0.20-0.58) | 0.25(0.15-0.42) | 0.27(0.16-0.46) | 0.28(0.16-0.47) | 0.39(0.23-0.67) | 0.33(0.19-0.56) | 0.34(0.20-0.58) | 0.26(0.16-0.45) | 0.43(0.25-0.74) | 0.25(0.15-0.42) | 0.47(0.28-0.79) | 0.27(0.16-0.45) | 0.24(0.14-0.39) | 0.40(0.24-0.66) | 0.36(0.22-0.58) | 0.51(0.31-0.83) | 0.52(0.32-0.86) | 0.25(0.15-0.40) | 0.35(0.22-0.58) | 0.35(0.21-0.57) | 0.45(0.28-0.74) | 0.35(0.22-0.57) | 0.38(0.24-0.62) | 0.51(0.32-0.83) |
| <i>TAC1</i>       | 0.24(0.12-0.48) | 1.14(0.56-2.33)   | 0.61(0.32-1.18)  | 0.89(0.45-1.75)  | 0.09(0.05-0.16)   | 0.33(0.18-0.59) | 0.22(0.13-0.39) | 0.30(0.17-0.52) | 0.22(0.13-0.38) | 0.24(0.14-0.42) | 0.24(0.14-0.42) | 0.35(0.20-0.60) | 0.29(0.17-0.51) | 0.31(0.17-0.52) | 0.23(0.14-0.41) | 0.38(0.22-0.67) | 0.22(0.13-0.37) | 0.42(0.25-0.72) | 0.24(0.14-0.41) | 0.21(0.13-0.35) | 0.35(0.21-0.60) | 0.31(0.19-0.53) | 0.45(0.27-0.75) | 0.46(0.28-0.78) | 0.22(0.13-0.36) | 0.31(0.2-0.52)  | 0.31(0.19-0.51) | 0.40(0.24-0.66) | 0.31(0.2-0.52)  | 0.34(0.21-0.56) | 0.45(0.28-0.75) |
| <i>H-cadherin</i> | 2.64(1.44-4.84) | 12.70(6.91-23.35) | 6.84(4.00-11.68) | 9.86(5.56-17.50) | 11.13(6.17-20.08) | 1.15(0.94-2.23) | 2.48(1.65-3.73) | 3.35(2.22-5.04) | 2.44(1.63-3.67) | 2.68(1.79-4.03) | 2.73(1.81-4.09) | 3.84(2.55-5.80) | 3.26(2.17-4.91) | 1.32(0.89-1.96) | 1.03(0.70-1.51) | 4.28(2.83-6.47) | 2.43(1.64-3.59) | 4.68(3.20-6.85) | 2.68(1.85-3.88) | 2.34(1.62-3.38) | 3.93(2.72-5.70) | 3.51(2.45-5.01) | 4.99(3.50-7.13) | 5.17(3.62-7.39) | 2.43(1.72-3.45) | 3.49(2.46-4.96) | 3.42(2.43-4.83) | 4.46(3.16-6.29) | 3.47(2.47-4.87) | 3.78(2.71-5.28) | 5.04(3.61-7.03) |
| <i>FHIT</i>       | 0.72(0.40-1.31) | 3.47(1.90-6.14)   | 1.87(1.10-3.16)  | 2.69(1.53-4.73)  | 3.04(1.70-5.43)   | 0.69(0.45-1.06) | 1.15(0.68-2.19) | 0.91(0.62-1.36) | 0.67(0.45-0.99) | 0.73(0.49-1.09) | 0.74(0.50-1.10) | 1.05(0.70-1.56) | 0.89(0.60-1.32) | 0.91(0.62-1.36) | 0.71(0.48-1.05) | 1.17(0.74-1.74) | 0.66(0.45-0.97) | 1.28(0.89-1.84) | 0.73(0.51-1.04) | 0.64(0.45-0.91) | 1.07(0.75-1.53) | 0.96(0.68-1.35) | 1.36(0.97-1.92) | 1.41(1.01-1.99) | 0.66(0.48-0.93) | 0.95(0.68-1.33) | 0.93(0.67-1.30) | 1.22(0.88-1.69) | 0.95(0.68-1.31) | 1.03(0.75-1.42) | 1.37(0.89-1.89) |
| <i>PCD</i>        | 1.06(0.60-1.88) | 5.12(2.90-9.05)   | 2.76(1.69-4.50)  | 3.97(2.33-6.77)  | 4.49(2.59-7.77)   | 0.40(0.27-0.61) | 1.48(0.99-2.19) | 1.35(0.95-1.91) | 0.98(0.70-1.39) | 1.08(0.77-1.53) | 1.10(0.78-1.55) | 1.55(1.09-2.20) | 1.32(0.93-1.86) | 1.35(0.95-1.91) | 1.05(0.74-1.48) | 1.72(1.21-2.46) | 0.98(0.71-1.36) | 1.89(1.38-2.58) | 1.08(0.80-1.46) | 0.94(0.70-1.27) | 1.59(1.17-2.15) | 1.41(1.06-1.88) | 2.01(1.51-2.68) | 2.08(1.56-2.78) | 0.98(0.74-1.29) | 1.41(1.07-1.86) | 1.38(1.05-1.81) | 1.80(1.37-2.35) | 1.40(1.07-1.82) | 1.52(1.18-1.97) | 2.03(1.57-2.62) |

|                 |                 |                 |                 |                 |                 |                 |                 |                 |                 |                 |                 |                 |                 |                 |                 |                 |                 |                 |                 |                 |                 |                 |                 |                 |                 |                 |                 |                 |                 |                 |                 |
|-----------------|-----------------|-----------------|-----------------|-----------------|-----------------|-----------------|-----------------|-----------------|-----------------|-----------------|-----------------|-----------------|-----------------|-----------------|-----------------|-----------------|-----------------|-----------------|-----------------|-----------------|-----------------|-----------------|-----------------|-----------------|-----------------|-----------------|-----------------|-----------------|-----------------|-----------------|-----------------|
| 0.79(0.45-1.39) | 3.79(2.14-6.72) | 2.04(1.25-3.35) | 2.94(1.72-5.03) | 3.32(1.91-5.77) | 0.30(0.20-0.45) | 1.09(0.74-1.63) | 0.74(0.52-1.05) |                 | 0.73(0.51-1.03) | 0.80(0.57-1.14) | 0.81(0.57-1.15) | 1.15(1.15-1.64) | 0.97(0.69-1.39) | 1.0(70-1.42)    | 0.78(0.55-1.10) | 1.28(0.89-1.83) | 0.73(0.52-1.01) | 1.40(1.02-1.92) | 0.80(0.59-1.09) | 0.70(0.52-0.95) | 1.17(1.60-2.10) | 1.05(1.40-2.10) | 1.49(1.99-2.06) | 1.54(2.06-2.06) | 0.73(0.96-1.38) | 1.04(1.38-1.34) | 1.02(1.75-1.75) | 1.33(1.75-1.75) | 1.03(1.35-1.35) | 1.12(1.47-1.47) | 1.50(1.95-1.95) |
| 1.08(0.61-1.91) | 5.20(2.94-9.20) | 2.80(1.71-4.76) | 4.03(2.37-6.88) | 4.56(2.63-7.90) | 0.41(0.27-0.61) | 1.49(1.01-2.22) | 1.02(0.72-1.44) | 1.37(0.97-1.94) |                 | 1.10(0.78-1.55) | 1.12(0.79-1.58) | 1.57(1.11-2.24) | 1.34(0.94-1.89) | 1.37(0.97-1.94) | 1.06(0.75-1.50) | 1.75(1.23-2.49) | 0.99(0.72-1.38) | 1.92(1.40-2.62) | 1.10(0.81-1.48) | 0.96(0.71-1.29) | 1.61(2.18-2.18) | 1.43(1.91-2.72) | 2.04(2.72-2.82) | 2.12(2.82-2.82) | 1.00(1.32-1.89) | 1.43(1.89-1.83) | 1.40(1.83-2.39) | 1.82(2.39-1.85) | 1.42(1.85-2.00) | 1.55(2.00-2.00) | 2.06(2.67-2.67) |
| 0.98(0.56-1.74) | 4.73(2.68-8.38) | 2.55(1.56-4.17) | 3.67(2.16-6.26) | 4.15(2.39-7.19) | 0.37(0.25-0.56) | 1.36(0.92-2.03) | 0.93(0.65-1.31) | 1.25(0.88-1.77) | 0.91(0.64-1.29) |                 | 1.02(0.72-1.44) | 1.43(1.01-2.04) | 1.22(0.86-1.73) | 1.25(0.88-1.77) | 0.97(0.69-1.37) | 1.59(1.12-2.27) | 0.91(0.65-1.26) | 1.75(1.27-2.39) | 1.00(0.74-1.35) | 0.87(0.65-1.18) | 1.47(1.99-1.74) | 1.31(1.74-2.48) | 1.86(2.48-2.57) | 1.93(2.57-2.20) | 0.91(1.20-1.72) | 1.30(1.72-1.67) | 1.28(1.67-2.18) | 1.66(2.18-1.69) | 1.29(1.69-1.82) | 1.41(1.82-1.82) | 1.88(2.43-2.43) |
| 0.97(0.55-1.71) | 4.66(2.63-8.25) | 2.51(1.53-4.10) | 3.62(2.12-6.17) | 4.08(2.36-7.08) | 0.37(0.24-0.55) | 1.34(0.91-1.99) | 0.91(0.64-1.29) | 1.23(0.87-1.74) | 0.90(0.63-1.27) | 0.98(0.70-1.39) |                 | 1.41(1.41-2.01) | 1.20(0.85-1.70) | 1.23(0.87-1.74) | 0.95(0.68-1.35) | 1.57(1.10-2.24) | 0.89(0.64-1.24) | 1.72(1.25-2.36) | 0.98(1.33-1.33) | 0.86(1.16-1.16) | 1.44(1.96-1.96) | 1.29(1.71-2.44) | 1.83(2.44-2.53) | 1.90(2.53-2.18) | 0.89(1.18-1.70) | 1.28(1.70-1.65) | 1.26(1.65-2.15) | 1.64(2.15-1.66) | 1.27(1.66-1.80) | 1.39(1.80-1.80) | 1.85(2.39-2.39) |
| 0.69(0.39-1.22) | 3.31(1.86-5.87) | 1.78(1.08-2.92) | 2.57(1.50-4.39) | 2.90(1.67-5.04) | 0.26(0.17-0.39) | 0.95(0.64-1.42) | 0.65(0.45-0.92) | 0.87(0.61-1.24) | 0.64(0.45-0.90) | 0.70(0.49-0.99) | 0.71(0.50-1.01) |                 | 0.85(0.60-1.21) | 0.87(0.61-1.24) | 0.68(0.48-0.96) | 1.11(0.78-1.60) | 0.63(0.45-0.88) | 1.22(1.68-1.68) | 0.70(0.51-0.95) | 0.61(0.45-0.83) | 1.02(1.40-1.22) | 0.91(1.22-1.74) | 1.30(1.81-1.81) | 1.35(1.81-0.84) | 0.63(1.21-1.18) | 0.91(1.18-1.53) | 0.89(1.18-1.19) | 1.16(1.53-1.19) | 0.90(1.19-1.28) | 0.98(1.28-1.71) | 1.31(1.71-1.71) |
| 0.81(0.46-1.43) | 3.89(2.20-6.89) | 2.09(1.28-3.43) | 3.02(1.77-5.15) | 3.41(1.96-5.92) | 0.31(0.20-0.46) | 1.12(0.76-1.67) | 0.76(0.54-1.08) | 1.03(0.72-1.46) | 0.75(0.53-1.06) | 0.82(0.58-1.17) | 0.83(0.59-1.18) | 1.18(1.18-1.68) |                 | 1.03(1.46-1.46) | 0.80(0.56-1.13) | 1.31(0.92-1.87) | 0.74(0.53-1.04) | 1.43(1.97-1.11) | 0.82(1.11-0.97) | 0.72(0.97-1.64) | 1.20(1.64-1.43) | 1.07(1.43-2.04) | 1.53(2.04-2.12) | 1.58(2.12-2.09) | 0.75(0.99-1.42) | 1.07(1.42-1.38) | 1.05(1.80-1.80) | 1.37(1.80-1.39) | 1.06(1.39-1.50) | 1.16(1.50-2.00) | 1.54(2.00-2.00) |
| 0.79(0.45-1.39) | 3.79(2.14-6.72) | 2.04(1.25-3.35) | 2.94(1.72-5.03) | 3.32(1.91-5.77) | 0.76(0.51-1.12) | 1.09(0.74-1.27) | 0.74(0.52-1.05) | 1.00(0.70-1.42) | 0.73(0.51-1.03) | 0.80(0.57-1.14) | 0.81(0.57-1.15) | 1.15(1.15-1.64) | 0.97(0.69-1.39) |                 | 0.78(0.55-1.10) | 1.28(0.89-1.83) | 0.72(0.52-1.01) | 1.40(1.02-1.92) | 0.80(0.59-1.09) | 0.70(0.52-0.95) | 1.17(1.60-2.10) | 1.04(1.40-2.10) | 1.49(1.99-2.06) | 1.54(2.06-2.06) | 0.73(0.96-1.38) | 1.04(1.38-1.34) | 1.02(1.75-1.75) | 1.33(1.75-1.75) | 1.03(1.35-1.35) | 1.13(1.47-1.47) | 1.50(1.95-1.95) |
| 1.01(0.58-1.79) | 4.88(2.76-8.64) | 2.63(1.61-4.30) | 3.79(2.22-6.46) | 4.28(2.47-7.42) | 0.97(0.66-1.44) | 1.41(0.95-2.09) | 0.95(0.68-1.35) | 1.29(1.83-1.33) | 0.94(1.33-1.46) | 1.03(1.46-1.48) | 1.05(1.48-2.10) | 1.48(2.10-1.78) | 1.26(1.78-1.83) | 1.29(1.83-1.83) |                 | 1.64(2.34-1.30) | 0.93(1.30-2.47) | 1.80(2.47-1.39) | 1.03(1.39-1.21) | 0.90(1.21-2.05) | 1.51(2.05-1.80) | 1.35(1.80-2.56) | 1.92(2.56-2.65) | 1.99(2.65-1.24) | 0.94(1.78-1.72) | 1.34(1.72-2.45) | 1.32(1.72-2.45) | 1.71(2.45-1.74) | 1.33(1.74-1.88) | 1.45(1.88-2.51) | 1.94(2.51-2.51) |
| 0.62(0.29-1.18) | 2.97(1.60-5.03) | 1.60(0.90-2.70) | 2.30(1.30-3.90) | 2.60(1.50-4.30) | 0.23(0.13-0.33) | 0.85(0.45-1.25) | 0.58(0.30-0.86) | 0.78(0.40-1.16) | 0.57(0.30-0.84) | 0.63(0.30-0.96) | 0.64(0.30-0.96) | 0.90(0.40-1.30) | 0.76(0.40-1.16) | 0.78(0.40-1.16) | 0.61(0.30-0.96) |                 | 0.57(0.30-0.96) | 1.09(0.40-1.30) | 0.63(0.30-0.96) | 0.55(0.30-0.96) | 0.92(0.40-1.30) | 0.82(0.40-1.30) | 1.17(0.40-1.30) | 1.21(0.40-1.30) | 0.57(0.30-0.96) | 0.82(0.40-1.30) | 0.80(0.40-1.30) | 1.04(0.40-1.30) | 0.81(0.40-1.30) | 0.88(0.40-1.30) | 1.18(0.40-1.30) |

|                         |                         |                         |                         |                         |                         |                         |                         |                         |                         |                         |                         |                         |                         |                         |                         |                         |                         |                         |                         |                         |                         |                         |                         |                         |                         |                         |                         |                         |                         |                         |                |
|-------------------------|-------------------------|-------------------------|-------------------------|-------------------------|-------------------------|-------------------------|-------------------------|-------------------------|-------------------------|-------------------------|-------------------------|-------------------------|-------------------------|-------------------------|-------------------------|-------------------------|-------------------------|-------------------------|-------------------------|-------------------------|-------------------------|-------------------------|-------------------------|-------------------------|-------------------------|-------------------------|-------------------------|-------------------------|-------------------------|-------------------------|----------------|
| 0.35-<br>1.09)          | 1.67-<br>5.28)          | 0.97-<br>2.63)          | 1.34-<br>3.95)          | 1.49-<br>4.53)          | 0.16-<br>0.35)          | 0.57-<br>1.28)          | 0.41-<br>0.83)          | 0.55-<br>1.12)          | 0.40-<br>0.81)          | 0.44-<br>0.89)          | 0.45-<br>0.91)          | 0.63-<br>1.29)          | 0.53-<br>1.09)          | 0.55-<br>1.12)          | 0.43-<br>0.87)          | CYCL                    | 0.41-<br>0.80)          | 0.79-<br>1.51)          | 0.46-<br>0.86)          | 0.40-<br>0.75)          | 0.67-<br>1.26)          | 0.61-<br>1.10)          | 0.87-<br>1.57)          | 0.90-<br>1.63)          | 0.43-<br>0.76)          | 0.61-<br>1.09)          | 0.60-<br>1.06)          | 0.79-<br>1.38)          | 0.62-<br>1.07)          | 0.68-<br>1.16)          | 0.90-<br>1.54) |
| 1.09(<br>0.62-<br>1.90) | 5.23(<br>2.99-<br>9.15) | 2.81(<br>1.74-<br>4.55) | 4.06(<br>2.41-<br>6.84) | 4.58(<br>2.67-<br>7.85) | 0.41(<br>0.28-<br>0.61) | 1.51(<br>1.03-<br>2.20) | 1.02(<br>0.74-<br>1.42) | 1.38(<br>0.99-<br>1.92) | 1.01(<br>0.72-<br>1.40) | 1.10(<br>0.80-<br>1.53) | 1.12(<br>0.81-<br>1.56) | 1.58(<br>1.13-<br>2.21) | 1.34(<br>0.97-<br>1.87) | 1.38(<br>0.99-<br>1.92) | 1.07(<br>0.77-<br>1.49) | 1.76(<br>1.26-<br>2.47) | MAG<br>E                | 1.93(<br>2.59)          | 1.10(<br>1.46)          | 0.96(<br>1.27)          | 1.62(<br>2.15)          | 1.44(<br>1.88)          | 2.05(<br>2.68)          | 2.13(<br>2.78)          | 1.00(<br>1.29)          | 1.44(<br>1.86)          | 1.41(<br>1.80)          | 1.83(<br>2.35)          | 1.43(<br>1.82)          | 1.56(<br>1.96)          | 2.07(<br>2.62) |
| 0.56(<br>0.33-<br>0.98) | 2.71(<br>1.56-<br>4.71) | 1.46(<br>0.91-<br>2.34) | 2.11(<br>1.26-<br>3.52) | 2.38(<br>1.40-<br>4.04) | 0.21(<br>0.15-<br>0.31) | 0.78(<br>0.54-<br>1.30) | 0.53(<br>0.39-<br>0.73) | 0.72(<br>0.52-<br>0.98) | 0.52(<br>0.38-<br>0.71) | 0.57(<br>0.42-<br>0.79) | 0.58(<br>0.43-<br>0.80) | 0.82(<br>0.60-<br>1.13) | 0.70(<br>0.51-<br>0.96) | 0.72(<br>0.52-<br>0.98) | 0.56(<br>0.41-<br>0.76) | 0.91(<br>0.66-<br>1.26) | 0.52(<br>0.39-<br>0.70) | HOX<br>A                | 0.57(<br>0.75)          | 0.50(<br>0.65)          | 0.84(<br>1.10)          | 0.75(<br>0.96)          | 1.07(<br>1.37)          | 1.10(<br>1.42)          | 0.52(<br>0.66)          | 0.75(<br>0.95)          | 0.73(<br>0.92)          | 0.95(<br>1.20)          | 0.74(<br>0.93)          | 0.81(<br>1.00)          | 1.08(<br>1.33) |
| 0.99(<br>0.57-<br>1.70) | 4.75(<br>2.75-<br>8.20) | 2.56(<br>1.61-<br>4.06) | 3.68(<br>2.22-<br>6.11) | 4.16(<br>2.46-<br>7.03) | 0.37(<br>0.26-<br>0.54) | 1.37(<br>0.96-<br>1.96) | 0.93(<br>0.69-<br>1.26) | 1.25(<br>0.92-<br>1.70) | 0.91(<br>0.67-<br>1.24) | 1.00(<br>0.74-<br>1.36) | 1.02(<br>0.75-<br>1.38) | 1.44(<br>1.05-<br>1.96) | 1.22(<br>0.90-<br>1.66) | 1.25(<br>0.92-<br>1.70) | 0.97(<br>0.72-<br>1.32) | 1.60(<br>1.17-<br>2.19) | 0.91(<br>0.68-<br>1.21) | 1.75(<br>1.34-<br>2.29) | 0.87(<br>0.68-<br>1.12) | 1.47(<br>1.14-<br>1.89) | 1.31(<br>1.04-<br>1.66) | 1.87(<br>1.48-<br>2.36) | 1.93(<br>1.53-<br>2.44) | 0.91(<br>0.73-<br>1.14) | 1.31(<br>1.04-<br>1.63) | 1.28(<br>1.03-<br>1.58) | 1.67(<br>1.35-<br>2.06) | 1.30(<br>1.05-<br>1.59) | 1.41(<br>1.16-<br>1.72) | 1.88(<br>2.29)          |                |
| 1.13(<br>0.66-<br>1.94) | 5.43(<br>3.15-<br>9.35) | 2.92(<br>1.85-<br>4.63) | 4.21(<br>2.55-<br>6.97) | 4.76(<br>2.82-<br>8.02) | 0.43(<br>0.30-<br>0.62) | 1.57(<br>1.10-<br>2.23) | 1.06(<br>0.79-<br>1.43) | 1.43(<br>0.96-<br>1.94) | 1.04(<br>0.78-<br>1.41) | 1.15(<br>0.85-<br>1.55) | 1.16(<br>0.86-<br>1.57) | 1.64(<br>1.21-<br>2.23) | 1.40(<br>1.03-<br>1.89) | 1.43(<br>1.06-<br>1.94) | 1.11(<br>0.82-<br>1.50) | 1.83(<br>1.34-<br>2.49) | 1.04(<br>0.79-<br>1.37) | 2.00(<br>1.54-<br>2.60) | 1.14(<br>0.89-<br>1.47) | 1.68(<br>1.31-<br>2.15) | 1.50(<br>1.20-<br>1.88) | 2.13(<br>1.70-<br>2.68) | 2.21(<br>1.76-<br>2.76) | 1.04(<br>0.84-<br>1.29) | 1.49(<br>1.20-<br>1.86) | 1.46(<br>1.19-<br>1.80) | 1.91(<br>1.55-<br>2.34) | 1.48(<br>1.21-<br>1.81) | 1.62(<br>1.34-<br>1.95) | 2.15(<br>1.78-<br>2.60) |                |
| 0.67(<br>0.39-<br>1.15) | 3.23(<br>1.87-<br>5.57) | 1.74(<br>1.10-<br>2.76) | 2.51(<br>1.51-<br>4.16) | 2.83(<br>1.68-<br>4.78) | 0.25(<br>0.18-<br>0.37) | 0.93(<br>0.65-<br>1.33) | 0.63(<br>0.47-<br>0.85) | 0.85(<br>0.63-<br>1.16) | 0.62(<br>0.46-<br>0.84) | 0.68(<br>0.50-<br>0.92) | 0.69(<br>0.51-<br>0.94) | 0.98(<br>0.72-<br>1.33) | 0.83(<br>0.61-<br>1.13) | 0.85(<br>0.63-<br>1.16) | 0.66(<br>0.49-<br>0.90) | 1.09(<br>0.80-<br>1.49) | 0.62(<br>0.47-<br>0.82) | 1.19(<br>0.91-<br>1.55) | 0.68(<br>0.53-<br>0.88) | 0.59(<br>0.46-<br>0.76) | 0.89(<br>0.71-<br>1.12) | 1.27(<br>1.01-<br>1.60) | 1.31(<br>1.04-<br>1.66) | 0.62(<br>0.50-<br>0.77) | 0.89(<br>0.71-<br>1.11) | 0.87(<br>0.70-<br>1.08) | 1.13(<br>0.92-<br>1.40) | 0.88(<br>0.72-<br>1.08) | 0.96(<br>0.79-<br>1.17) | 1.28(<br>1.05-<br>1.56) |                |
| 0.75(<br>0.44-<br>1.28) | 3.62(<br>2.12-<br>6.20) | 1.95(<br>1.24-<br>3.06) | 2.81(<br>1.71-<br>4.62) | 2.13(<br>1.26-<br>3.58) | 0.29(<br>0.20-<br>0.41) | 1.04(<br>0.74-<br>1.47) | 0.47(<br>0.35-<br>0.64) | 0.96(<br>0.72-<br>1.28) | 0.70(<br>0.52-<br>0.93) | 0.77(<br>0.57-<br>1.02) | 0.78(<br>0.58-<br>1.04) | 1.10(<br>0.82-<br>1.47) | 0.93(<br>0.70-<br>1.24) | 0.95(<br>0.72-<br>1.28) | 0.74(<br>0.56-<br>0.99) | 1.22(<br>0.91-<br>1.64) | 0.69(<br>0.53-<br>0.90) | 1.34(<br>1.04-<br>1.71) | 0.76(<br>0.60-<br>0.96) | 0.67(<br>0.53-<br>0.84) | 1.12(<br>0.89-<br>1.42) | 1.42(<br>1.15-<br>1.76) | 1.48(<br>1.19-<br>1.82) | 0.69(<br>0.57-<br>0.85) | 1.00(<br>0.82-<br>1.22) | 0.98(<br>0.81-<br>1.18) | 1.27(<br>1.05-<br>1.54) | 0.99(<br>0.83-<br>1.19) | 1.08(<br>0.91-<br>1.28) | 1.44(<br>1.21-<br>1.70) |                |
| 0.53(<br>0.31-<br>0.90) | 2.54(<br>1.49-<br>4.35) | 1.37(<br>0.87-<br>2.15) | 1.97(<br>1.20-<br>3.24) | 2.23(<br>1.33-<br>3.73) | 0.20(<br>0.14-<br>0.29) | 0.73(<br>0.52-<br>1.03) | 0.50(<br>0.37-<br>0.66) | 0.67(<br>0.50-<br>0.90) | 0.49(<br>0.37-<br>0.65) | 0.54(<br>0.40-<br>0.72) | 0.55(<br>0.41-<br>0.73) | 0.77(<br>0.57-<br>1.03) | 0.65(<br>0.49-<br>0.87) | 0.67(<br>0.50-<br>0.90) | 0.52(<br>0.39-<br>0.69) | 0.86(<br>0.64-<br>1.15) | 0.49(<br>0.37-<br>0.63) | 0.94(<br>0.73-<br>1.20) | 0.54(<br>0.42-<br>0.68) | 0.47(<br>0.37-<br>0.59) | 0.79(<br>0.63-<br>0.99) | 0.70(<br>0.57-<br>0.87) | 1.04(<br>0.84-<br>1.28) | 0.49(<br>0.40-<br>0.59) | 0.70(<br>0.57-<br>0.85) | 0.69(<br>0.57-<br>0.83) | 0.89(<br>0.74-<br>1.08) | 0.69(<br>0.58-<br>0.83) | 0.76(<br>0.64-<br>0.90) | 1.01(<br>0.85-<br>1.19) |                |
| 0.51(<br>0.30-<br>0.87) | 2.46(<br>1.44-<br>4.20) | 1.32(<br>0.84-<br>2.08) | 1.91(<br>1.16-<br>3.13) | 2.15(<br>1.29-<br>3.60) | 0.19(<br>0.14-<br>0.28) | 0.71(<br>0.50-<br>0.99) | 0.48(<br>0.36-<br>0.64) | 0.65(<br>0.49-<br>0.87) | 0.47(<br>0.36-<br>0.63) | 0.52(<br>0.39-<br>0.69) | 0.53(<br>0.40-<br>0.70) | 0.74(<br>0.55-<br>1.00) | 0.63(<br>0.47-<br>0.84) | 0.65(<br>0.49-<br>0.87) | 0.50(<br>0.38-<br>0.67) | 0.83(<br>0.62-<br>1.11) | 0.47(<br>0.36-<br>0.61) | 0.91(<br>0.71-<br>1.16) | 0.52(<br>0.41-<br>0.65) | 0.45(<br>0.36-<br>0.57) | 0.76(<br>0.60-<br>0.96) | 0.68(<br>0.55-<br>0.84) | 0.70(<br>0.59-<br>0.82) | 0.47(<br>0.39-<br>0.58) | 0.68(<br>0.55-<br>0.83) | 0.66(<br>0.55-<br>0.80) | 0.86(<br>0.71-<br>1.04) | 0.67(<br>0.56-<br>0.80) | 0.73(<br>0.62-<br>0.87) | 0.97(<br>0.82-<br>1.15) |                |

|                 |                 |                 |                 |                 |                 |                 |                 |                 |                 |                 |                 |                 |                 |                 |                 |                 |                 |                 |                 |                 |                 |                 |                 |            |            |                 |                 |                 |                 |                 |                 |             |
|-----------------|-----------------|-----------------|-----------------|-----------------|-----------------|-----------------|-----------------|-----------------|-----------------|-----------------|-----------------|-----------------|-----------------|-----------------|-----------------|-----------------|-----------------|-----------------|-----------------|-----------------|-----------------|-----------------|-----------------|------------|------------|-----------------|-----------------|-----------------|-----------------|-----------------|-----------------|-------------|
| 1.08(0.64-1.84) | 5.22(3.07-8.88) | 2.81(1.80-4.39) | 4.05(2.48-6.62) | 4.57(2.75-7.61) | 0.41(0.29-0.58) | 1.51(1.08-2.10) | 1.02(0.77-1.35) | 1.38(1.04-1.82) | 1.00(0.76-1.32) | 1.10(0.84-1.46) | 1.12(0.85-1.48) | 1.58(1.19-2.10) | 1.34(1.01-1.78) | 1.38(1.04-1.82) | 1.07(0.81-1.41) | 1.76(1.32-2.34) | 1.00(0.77-1.29) | 1.92(1.52-2.44) | 1.10(0.88-1.37) | 0.96(0.78-1.19) | 1.62(1.30-2.02) | 1.44(1.18-1.76) | 2.05(2.50-2.59) | 2.12(2.59) |            | 1.43(1.19-1.73) | 1.41(1.18-1.67) | 1.83(1.54-2.18) | 1.42(1.21-1.68) | 1.55(1.33-1.81) | 2.07(1.78-2.41) |             |
| 0.76(0.45-1.28) | 3.63(2.14-6.19) | 1.96(1.25-3.06) | 2.82(1.73-4.62) | 3.19(1.91-5.31) | 0.29(0.20-0.41) | 1.04(0.75-1.49) | 0.71(0.54-0.94) | 0.96(0.72-1.27) | 0.70(0.53-0.92) | 0.77(1.01-1.03) | 0.78(1.03-1.46) | 1.10(1.46)      | 0.93(1.24)      | 0.96(1.27)      | 1.07(1.41)      | 1.22(1.63)      | 0.70(0.90)      | 1.34(1.70)      | 0.77(0.96)      | 0.67(0.83)      | 1.13(1.41)      | 1.00(1.23)      | 1.43(1.75)      | 1.48(1.81) | 0.70(0.84) |                 | 0.98(1.17)      | 1.28(1.52)      | 0.99(1.17)      | 1.08(1.26)      | 1.44(1.68)      |             |
| 0.77(0.46-1.30) | 3.71(2.19-6.29) | 2.00(1.29-3.11) | 2.88(1.77-4.69) | 3.25(1.96-5.39) | 0.29(0.21-0.41) | 1.07(0.77-1.49) | 0.73(0.55-0.95) | 0.98(0.74-1.29) | 0.71(0.55-0.94) | 0.78(1.03-1.04) | 0.90(1.04-1.48) | 1.12(1.48)      | 0.95(1.25)      | 0.97(1.23)      | 0.76(0.99)      | 1.25(1.66)      | 0.71(0.91)      | 1.37(1.72)      | 0.78(0.97)      | 0.68(0.84)      | 1.15(1.42)      | 1.02(1.24)      | 1.46(1.76)      | 1.51(1.82) | 0.71(0.85) | 1.02(1.22)      |                 | 1.30(1.53)      | 1.01(1.18)      | 1.10(1.27)      | 1.47(1.69)      |             |
| 0.59(0.35-1.00) | 2.85(1.68-4.83) | 1.53(0.99-2.39) | 2.21(1.36-3.60) | 2.50(1.51-4.14) | 0.22(0.16-0.32) | 0.82(0.59-1.14) | 0.56(0.43-0.73) | 0.75(0.57-0.99) | 0.55(0.42-0.72) | 0.60(0.46-0.79) | 0.61(0.47-0.80) | 0.86(1.14)      | 0.73(0.96)      | 0.75(0.99)      | 0.58(0.77)      | 0.96(1.27)      | 0.55(0.70)      | 1.05(1.32)      | 0.60(0.74)      | 0.52(0.65)      | 0.88(1.09)      | 0.79(0.95)      | 1.12(1.35)      | 1.16(1.40) | 0.55(0.65) | 0.78(0.94)      | 0.77(0.90)      |                 | 0.78(0.91)      | 0.85(0.98)      | 1.13(1.30)      |             |
| 0.76(0.45-1.28) | 3.67(2.17-6.20) | 1.97(1.27-3.06) | 2.85(1.75-4.62) | 3.21(1.94-5.31) | 0.29(0.21-0.41) | 1.06(0.76-1.46) | 0.72(0.55-0.93) | 0.97(1.27)      | 0.71(0.54-0.92) | 0.77(1.01-1.03) | 0.79(1.03-1.46) | 1.11(1.46)      | 0.94(1.23)      | 0.97(1.27)      | 0.75(0.98)      | 1.23(1.63)      | 0.70(0.89)      | 1.35(1.69)      | 0.77(0.95)      | 0.68(0.83)      | 1.13(1.40)      | 1.01(1.21)      | 1.44(1.73)      | 1.49(1.79) | 0.70(0.83) | 1.01(1.19)      | 0.99(1.15)      | 1.29(1.50)      |                 | 1.09(1.24)      | 1.45(1.66)      |             |
| 0.70(0.42-1.17) | 3.36(1.99-5.66) | 1.81(1.17-2.79) | 2.61(1.61-4.22) | 2.95(1.79-4.85) | 0.26(0.19-0.37) | 0.96(0.71-1.33) | 0.66(0.51-0.85) | 0.89(1.15)      | 0.65(0.84)      | 0.71(0.92)      | 0.72(0.93)      | 1.02(1.12)      | 0.86(1.12)      | 0.89(1.15)      | 0.69(0.89)      | 1.13(1.48)      | 0.64(0.81)      | 1.24(1.53)      | 0.71(0.86)      | 0.62(0.75)      | 1.04(1.27)      | 0.93(1.10)      | 1.32(1.56)      | 1.37(1.62) | 0.64(0.75) | 0.92(1.08)      | 0.91(1.04)      | 1.18(1.36)      | 0.92(1.04)      |                 | 1.33(1.49)      |             |
| 0.52(0.31-0.88) | 2.52(1.50-4.25) | 1.36(0.88-2.09) | 1.96(1.21-3.16) | 2.21(1.34-3.64) | 0.20(0.14-0.28) | 0.73(0.53-1.0)  | 0.49(0.38-0.64) | 0.66(0.86)      | 0.48(0.63)      | 0.53(0.69)      | 0.54(0.70)      | 0.76(0.99)      | 0.65(0.84)      | 0.66(0.86)      | 0.52(0.67)      | 0.85(1.11)      | 0.48(0.61)      | 0.93(1.15)      | 0.53(0.65)      | 0.46(0.56)      | 0.78(0.95)      | 0.70(0.82)      | 0.99(1.17)      | 1.03(1.22) | 0.48(0.56) | 0.69(0.81)      | 0.68(0.78)      | 0.88(1.02)      | 0.69(0.78)      | 0.75(0.84)      |                 | RASS<br>F1A |

In column the methylated gene compared with the other 31 methylated genes; in row the other 31 methylated genes compared with the methylated gene. OR>1 means that the methylated gene had a higher diagnostic accuracy, and 95% CI excluding 1 was considered significant.
